# Supplementary material for: An Unsupervised Algorithm for Host Identification in Flaviviruses
Source: MDPI journal article supplement (doi:10.3390/life11050442), 2021-05-14
Supplement: s1 [file s1]

## SUPPLEMENTARY MATERIAL

### **An unsupervised algorithm for host identification in flaviviruses**

Phuoc Truong Nguyen <sup>1, 2</sup>, Santiago Garcia-Vallve <sup>3</sup>, Pere Puigbò <sup>1, 4, 5, \*</sup>

<sup>1</sup> *Department of Biology, University of Turku, Turku, Finland.*

<sup>2</sup> *Currently at the Department of Virology, Medicum, Faculty of Medicine, University of Helsinki, Helsinki, Finland.*

<sup>3</sup> *Research Group in Cheminformatics & Nutrition, Department of Biochemistry and Biotechnology, Rovira i Virgili University, Tarragona, Catalonia, Spain*

<sup>4</sup> *Currently at the Department of Biochemistry and Biotechnology, Rovira i Virgili University, Tarragona, Catalonia, Spain*

<sup>5</sup> *Currently at the Nutrition and Health Unit, Eurecat Technology Centre of Catalonia, Reus, Catalonia, Spain*

*\* Corresponding author: [pepuav@utu.fi](mailto:pepuav@utu.fi)*

**Supplementary table S1. List of flaviviruses (genus *Flavivirus*) and their putative hosts.**

| Virus name                       | Accession codes |                | GC3   | Based on the literature                                                                                                                                                                                                                                                                                       |                | Correspondence Analysis (CA) |        |                                   |                                   |
|----------------------------------|-----------------|----------------|-------|---------------------------------------------------------------------------------------------------------------------------------------------------------------------------------------------------------------------------------------------------------------------------------------------------------------|----------------|------------------------------|--------|-----------------------------------|-----------------------------------|
|                                  | CDS             | AA             |       | Putative hosts (H) and vectors (V)                                                                                                                                                                                                                                                                            | Classification | Dim. 1                       | Dim. 2 | Centroid classification           | The Nearest host                  |
| Aedes flavivirus                 | NC_012932.1     | YP_003029843.1 | 0.531 | <i>Aedes albopictus</i> (H) <sup>1</sup><br><i>Aedes flavopictus</i> (H) [1]                                                                                                                                                                                                                                  | IOFV           | 0.395                        | -1.636 | IOFV /<br>Mosquito                | <i>Aedes albopictus</i>           |
| Alfuy virus                      | AY898809.1      | AAX82481.1     | 0.525 | <i>Mus musculus</i> (H) <sup>1</sup><br><i>Centropus phasianinus</i> (H) <sup>1</sup><br><i>Mammalia</i> (H) [2]<br><i>Culex pullus</i> (V) [3]<br><i>Culex sitiens</i> (V) [4]                                                                                                                               | MBFV           | -0.025                       | -0.498 | MBFV /<br>Vertebrate,<br>mosquito | <i>Columba livia</i>              |
| Alkhurma hemorrhagic fever virus | NC_004355.1     | NP_722551.1    | 0.579 | <i>Ixodes petauristae</i> (V) [5]<br><i>Ixodes ceylonensis</i> (V) [5]<br><i>Homo sapiens</i> (H) [5, 6]                                                                                                                                                                                                      | TBFV           | 0.792                        | 0.745  | TBFV / Tick,<br>vertebrate        | <i>Sus scrofa</i>                 |
| Anopheles flavivirus variant 1   | NC_031327.1     | YP_009305197.1 | 0.525 | <i>Anopheles gambiae</i> (H) <sup>1</sup>                                                                                                                                                                                                                                                                     | IOFV           | 0.208                        | -1.993 | IOFV /<br>Mosquito                | <i>Aedes albopictus</i>           |
| Anopheles flavivirus variant 2   | KX148547.1      | AOR51360.1     | 0.519 | <i>Anopheles gambiae</i> (H) <sup>2</sup>                                                                                                                                                                                                                                                                     | IOFV           | -0.037                       | -1.419 | IOFV /<br>Mosquito,<br>vertebrate | <i>Aedes albopictus</i>           |
| Apoi virus                       | NC_003676.1     | NP_620045.1    | 0.501 | <i>Apodemus argenteus</i> (H) <sup>1</sup>                                                                                                                                                                                                                                                                    | UVFV           | -0.966                       | 0.752  | MBFV /<br>Vertebrate              | <i>Homo sapiens</i>               |
| Bagaza virus                     | NC_012534.1     | YP_002790883.1 | 0.529 | <i>Culex tritaeniorhynchus</i> (V) [7]<br><i>Homo sapiens</i> (H) [7]<br><i>Alectoris rufa</i> (H) [8]<br><i>Phasianus colchicus</i> (H) [8]                                                                                                                                                                  | MBFV           | -0.081                       | 0.126  | MBFV /<br>Vertebrate,<br>mosquito | <i>Gallus gallus</i>              |
| Bainyik virus                    | KM225264.1      | AIJ19433.1     | 0.528 | <i>Culicidae</i> (V) <sup>1</sup><br><i>Aedes albopictus</i> (V) <sup>1</sup><br><i>Mus musculus</i> (H) <sup>1</sup><br><i>Aedes</i> sp. (V) <sup>1</sup><br>Vertebrates (H) [9]                                                                                                                             | MBFV           | -0.093                       | 0.111  | MBFV /<br>Vertebrate,<br>mosquito | <i>Gallus gallus</i>              |
| Bamaga virus                     | NC_033725.1     | YP_009345036.1 | 0.500 | <i>Culex sitiens</i> (V) <sup>1</sup><br><i>Marsupialia</i> (H) [9]                                                                                                                                                                                                                                           | MBFV           | -1.003                       | 0.537  | UVFV /<br>Vertebrate              | <i>Alligator mississippiensis</i> |
| Banzi virus                      | DQ859056.1      | ABI54472.1     | 0.548 | <i>Culex rubinotus</i> (V) [10]<br><i>Mansonia africana</i> (V) [10]<br><i>Mesocricetus auratus</i> (H) [10]<br><i>Mastomys natalensis</i> (H) [10]                                                                                                                                                           | MBFV           | -0.191                       | 1.293  | MBFV /<br>Vertebrate              | <i>Myotis brandtii</i>            |
| Bouboui virus                    | NC_033693.1     | YP_009344961.1 | 0.493 | <i>Antilocapra</i> (H) <sup>1</sup><br><i>Rodentia</i> (H) <sup>1</sup><br><i>Cercopithecus nictitans</i> (H) <sup>1</sup><br><i>Papio papio</i> (H) <sup>1</sup><br><i>Anopheles paludis</i> (V) [10]<br><i>Eretmapodites inornatus</i> (V) [10]<br><i>Aedes</i> spp. (V) [10]<br><i>Culex</i> spp. (V) [10] | MBFV           | -1.111                       | 0.669  | MBFV /<br>Vertebrate              | <i>Alligator mississippiensis</i> |
| Bussuquara virus                 | NC_009026.2     | YP_001040004.1 | 0.521 | <i>Chlorocebus aethiops</i> (H) <sup>1</sup><br><i>Homo sapiens</i> (H) <sup>1</sup><br><i>Proechimys</i> spp. (H) [11]<br><i>Alouatta belzebul</i> (H) [12]                                                                                                                                                  | MBFV           | -0.200                       | 0.071  | MBFV /<br>Vertebrate,<br>mosquito | <i>Gallus gallus</i>              |

|                                           |             |                |       |                                                                                                                                                                                                                |        |        |        |                                            |                                   |
|-------------------------------------------|-------------|----------------|-------|----------------------------------------------------------------------------------------------------------------------------------------------------------------------------------------------------------------|--------|--------|--------|--------------------------------------------|-----------------------------------|
| Cacipacore virus                          | NC_026623.1 | YP_009126874.1 | 0.519 | <i>Formicarius analis</i> (H) <sup>1</sup><br><i>Homo sapiens</i> (H) [13]                                                                                                                                     | MBFV   | -0.224 | -0.236 | MBFV /<br>Vertebrate,<br>mosquito          | <i>Columba livia</i>              |
| Calbertado virus                          | KX669689.1  | ASA45776.1     | 0.567 | <i>Culex tarsalis</i> (H) <sup>2</sup><br><i>Culex pipiens</i> (H) [14]                                                                                                                                        | IOFV   | 1.330  | -2.695 | IOFV /<br>Mosquito                         | <i>Aedes albopictus</i>           |
| Cell fusing agent virus                   | NC_001564.2 | YP_009259257.1 | 0.566 | <i>Aedes aegypti</i> (H) <sup>1</sup><br><i>Culicidae</i> (H) [15]                                                                                                                                             | IOFV   | 0.678  | 0.253  | MBFV /<br>Mosquito,<br>vertebrate,<br>tick | <i>Bos taurus</i>                 |
| Chaoyang virus                            | NC_017086.1 | YP_005454257.1 | 0.492 | <i>Culicidae</i> (H) <sup>1</sup>                                                                                                                                                                              | dhIOFV | -0.536 | -1.048 | dhIOFV /<br>Vertebrate,<br>mosquito        | <i>Anas platyrhynchos</i>         |
| Culex flavivirus                          | NC_008604.2 | YP_899469.2    | 0.603 | <i>Culex pipiens</i> (H) <sup>1</sup>                                                                                                                                                                          | IOFV   | 1.874  | -1.680 | IOFV /<br>Mosquito                         | <i>Culex quinquefasciatus</i>     |
| Culiseta flavivirus                       | NC_030290.1 | YP_009256193.1 | 0.492 | <i>Culiseta melanura</i> (H) <sup>1</sup>                                                                                                                                                                      | IOFV   | -0.293 | -2.071 | IOFV /<br>Mosquito                         | <i>Aedes aegypti</i>              |
| Deer tick virus                           | AF311056.1  | AAL32169.1     | 0.561 | <i>Ixodes scapularis</i> <sup>1</sup>                                                                                                                                                                          | TBFV   | 0.392  | 0.525  | TBFV / Tick,<br>vertebrate                 | <i>Bos taurus</i>                 |
| Dengue virus 1                            | NC_001477.1 | NP_059433.1    | 0.462 | <i>Aedes aegypti</i> (V) <sup>1</sup><br><i>Aedes albopictus</i> (V) <sup>1</sup><br><i>Homo sapiens</i> (H) <sup>1</sup>                                                                                      | MBFV   | -1.244 | -0.627 | dhIOFV /<br>Vertebrate                     | <i>Anas platyrhynchos</i>         |
| Dengue virus 2                            | NC_001474.2 | NP_056776.2    | 0.459 | <i>Aedes aegypti</i> (V) <sup>1</sup><br><i>Erythrocebus patas</i> (H) <sup>1</sup><br><i>Homo sapiens</i> (H) <sup>1</sup><br><i>Aedes furcifer</i> (V) <sup>1</sup><br><i>Aedes taylori</i> (V) <sup>1</sup> | MBFV   | -1.475 | -0.059 | dhIOFV /<br>Vertebrate                     | <i>Anas platyrhynchos</i>         |
| Dengue virus 3                            | NC_001475.2 | YP_001621843.1 | 0.468 | <i>Erythrocebus patas</i> (H) <sup>1</sup><br><i>Homo sapiens</i> (H) <sup>1</sup><br><i>Diceromyia</i> (V) <sup>1</sup><br><i>Aedimorphus</i> (V) <sup>1</sup><br><i>Stegomyia</i> (V) <sup>1</sup>           | MBFV   | -1.437 | 0.706  | MBFV /<br>Vertebrate                       | <i>Alligator mississippiensis</i> |
| Dengue virus 4                            | NC_002640.1 | NP_073286.1    | 0.481 | <i>Aedes aegypti</i> (V) <sup>1</sup><br><i>Aedes albopictus</i> (V) <sup>1</sup><br><i>Homo sapiens</i> (H) <sup>1</sup><br><i>Aedes polynesiensis</i> (V) <sup>1</sup>                                       | MBFV   | -1.176 | 1.138  | MBFV /<br>Vertebrate                       | <i>Homo sapiens</i>               |
| Donggang virus                            | NC_016997.1 | YP_005352889.1 | 0.484 | <i>Culicidae</i> (V) <sup>1</sup><br><i>Aedes</i> sp. (V) <sup>1</sup>                                                                                                                                         | dhIOFV | -1.092 | -0.490 | dhIOFV /<br>Vertebrate                     | <i>Anas platyrhynchos</i>         |
| Edge Hill virus                           | NC_030289.1 | YP_009256192.1 | 0.488 | <i>Macropodidae</i> (H) <sup>1</sup><br><i>Culex annulirostris</i> (V) [10]<br><i>Anopheles meraukensis</i> (V) [10]<br><i>Aedes vigilax</i> (V) [10]                                                          | MBFV   | -1.091 | 0.123  | UVFV /<br>Vertebrate                       | <i>Alligator mississippiensis</i> |
| Entebbe bat virus                         | NC_008718.1 | YP_950477.1    | 0.567 | <i>Chiroptera</i> (H) <sup>1</sup>                                                                                                                                                                             | MBFV   | 0.426  | 0.881  | MBFV /<br>Vertebrate,<br>tick              | <i>Myotis davidii</i>             |
| Far Eastern tick-borne encephalitis virus | JX498940.1  | AFV41132.1     | 0.589 | <i>Ixodes persulcatus</i> (V) [16]<br><i>Mus musculus</i> (H) [16]                                                                                                                                             | TBFV   | 0.958  | 0.646  | TBFV / Tick,<br>vertebrate                 | <i>Sus scrofa</i>                 |
| Fitzroy River Virus                       | KM361634.1  | AKH03452.1     | 0.483 | <i>Aedes normanensis</i> (V) <sup>2</sup><br><i>Anopheles amictus</i> (V) [17]<br><i>Culex annulirostris</i> (V) [17]<br><i>Mammalia</i> (H) [17]<br><i>Aves</i> (H) [17]                                      | MBFV   | -1.367 | 1.286  | MBFV /<br>Vertebrate                       | <i>Homo sapiens</i>               |

|                                              |             |                |       |                                                                                                                                                                                                                                                                                                         |        |        |        |                                         |                         |
|----------------------------------------------|-------------|----------------|-------|---------------------------------------------------------------------------------------------------------------------------------------------------------------------------------------------------------------------------------------------------------------------------------------------------------|--------|--------|--------|-----------------------------------------|-------------------------|
| Gadgets Gully virus                          | NC_033723.1 | YP_009345034.1 | 0.553 | <i>Aves</i> (H) <sup>1</sup><br><i>Homo sapiens</i> (H) <sup>1</sup><br><i>Ixodes uriae</i> (V) [18]                                                                                                                                                                                                    | TBFV   | 0.515  | 0.116  | TBFV / Tick,<br>vertebrate,<br>mosquito | <i>Gallus gallus</i>    |
| Hanko virus                                  | NC_030401.1 | YP_009259489.1 | 0.488 | <i>Culicidae</i> (H) <sup>1</sup><br><i>Ochlerotatus punctor</i> (H) [19]<br><i>Ochlerotatus caspius</i> (H) [19]                                                                                                                                                                                       | IOFV   | -0.211 | -2.423 | IOFV /<br>Mosquito                      | <i>Aedes aegypti</i>    |
| Iguape virus                                 | AY632538.4  | AAV34154.1     | 0.557 | Rodents (H) [20]<br>Sentinel mouse (H) [20]<br>Marsupials (H) [20]<br>Birds (H) [20]                                                                                                                                                                                                                    | MBFV   | 0.449  | 0.341  | MBFV /<br>Vertebrate,<br>mosquito, tick | <i>Bos taurus</i>       |
| Ilheus virus                                 | NC_009028.2 | YP_001040006.1 | 0.581 | <i>Culex</i> (V) <sup>1</sup><br><i>Haemagogus</i> (V) <sup>1</sup><br><i>Psorophora</i> (V) <sup>1</sup><br><i>Aves</i> (H) <sup>1</sup><br><i>Homo sapiens</i> (H) <sup>1</sup><br><i>Sabethes</i> (V) <sup>1</sup><br><i>Ochlerotatus</i> (V) <sup>1</sup><br><i>Trichoprosopon</i> (V) <sup>1</sup> | MBFV   | 0.643  | 1.266  | MBFV /<br>Vertebrate,<br>tick           | <i>Sus scrofa</i>       |
| Ilomantsi virus                              | NC_024805.1 | YP_009056847.1 | 0.476 | <i>Culicidae</i> (H) <sup>1</sup>                                                                                                                                                                                                                                                                       | dhIOFV | -0.963 | -1.410 | dhIOFV /<br>Vertebrate,<br>mosquito     | <i>Xenopus laevis</i>   |
| Israel turkey meningoencephalomyelitis virus | KC734549.1  | AGV15505.1     | 0.522 | <i>Meleagris gallopavo</i> (H) <sup>2</sup><br><i>Ochlerotatus caspius</i> (V) [21]<br><i>Culicoides imicola</i> (V) [21]<br><i>Culex pipiens</i> (V) [21]<br><i>Phlebotomus papatasi</i> (V) [21]<br><i>Culicoides distinctipennis</i> (V) [22]                                                        | MBFV   | -0.218 | -0.028 | MBFV /<br>Vertebrate,<br>mosquito       | <i>Gallus gallus</i>    |
| Japanese encephalitis virus                  | NC_001437.1 | NP_059434.1    | 0.557 | <i>Culex tritaeniorhynchus</i> (V) <sup>1</sup><br><i>Ardeidae</i> (H) <sup>1</sup><br><i>Homo sapiens</i> (H) <sup>1</sup><br><i>Equus caballus</i> (H) <sup>1</sup><br><i>Sus scrofa</i> (H) <sup>1</sup><br><i>Bos Taurus</i> (H) <sup>1</sup><br><i>Culex gelidus</i> (V) <sup>1</sup>              | MBFV   | 0.544  | 0.060  | MBFV /<br>Vertebrate,<br>mosquito, tick | <i>Gallus gallus</i>    |
| Jugra virus                                  | NC_033699.1 | YP_009344969.1 | 0.491 | <i>Cynopterus brachyotis</i> (H) <sup>1</sup><br><i>Aedes</i> sp. (V) [10]<br><i>Uranotaenia</i> sp. (V) [10]                                                                                                                                                                                           | MBFV   | -1.201 | 0.991  | MBFV /<br>Vertebrate                    | <i>Homo sapiens</i>     |
| Jutiapa virus                                | NC_026620.1 | YP_009126871.1 | 0.447 | <i>Sigmodon hispidus</i> (H) <sup>1</sup>                                                                                                                                                                                                                                                               | UVFV   | -1.797 | -0.035 | UVFV /<br>Vertebrate                    | <i>Xenopus laevis</i>   |
| Kadam virus                                  | NC_033724.1 | YP_009345035.1 | 0.560 | <i>Homo sapiens</i> <sup>1</sup><br><i>Rhipicephalus pravus</i> (V) [23]<br><i>Rhipicephalus pulchellus</i> (V) [24]<br><i>Amblyomma variegatum</i> (V) [24]<br><i>Hyalomma dromedarii</i> (V) [25]<br><i>Dermacentor variabilis</i> (V) [26]<br><i>Mus musculus</i> (H) [26]                           | TBFV   | 0.298  | 0.923  | TBFV / Tick,<br>vertebrate              | <i>Myotis davidii</i>   |
| Kamiti River virus                           | NC_005064.1 | NP_891560.1    | 0.541 | <i>Aedes</i> (H) <sup>1</sup>                                                                                                                                                                                                                                                                           | IOFV   | 0.248  | -0.732 | dhIOFV /<br>Mosquito,<br>vertebrate     | <i>Aedes albopictus</i> |
| Karshi virus                                 | NC_006947.1 | YP_224133.1    | 0.608 | <i>Homo sapiens</i> (H) <sup>1</sup><br><i>Rodentia</i> (H) <sup>1</sup><br><i>Ornithodoros papillipes</i> (V) [27]<br><i>Mus musculus</i> (H) [27]                                                                                                                                                     | TBFV   | 1.376  | 1.387  | TBFV / Tick,<br>vertebrate              | <i>Sus scrofa</i>       |

|                               |             |                |       |                                                                                                                                                                                                                                                                                                                                                                                                                            |        |        |        |                                         |                          |
|-------------------------------|-------------|----------------|-------|----------------------------------------------------------------------------------------------------------------------------------------------------------------------------------------------------------------------------------------------------------------------------------------------------------------------------------------------------------------------------------------------------------------------------|--------|--------|--------|-----------------------------------------|--------------------------|
| Kedougou virus                | NC_012533.1 | YP_002790882.1 | 0.595 | <i>Culicidae</i> (V) <sup>1</sup><br><i>Aedes dalzieli</i> (V) [28]<br><i>Homo sapiens</i> (H) [29]                                                                                                                                                                                                                                                                                                                        | MBFV   | 0.816  | 1.715  | TBFV /<br>Vertebrate                    | <i>Sus scrofa</i>        |
| Kokobera virus                | NC_009029.2 | YP_001040007.1 | 0.527 | <i>Aedes albopictus</i> (V) <sup>1</sup><br><i>Macropus</i> (H) <sup>1</sup><br><i>Wallabia</i> (H) <sup>1</sup><br><i>Homo sapiens</i> (H) <sup>1</sup><br><i>Culex annulirostris</i> (V) <sup>1</sup><br><i>Ochlerotatus vigilax</i> (V) <sup>1</sup><br><i>Ochlerotatus camptorhynchus</i> (V) <sup>1</sup><br><i>Culex sitiens</i> (V) [30]                                                                            | MBFV   | 0.036  | 0.089  | MBFV /<br>Vertebrate,<br>mosquito       | <i>Gallus gallus</i>     |
| Koutango virus                | EU082200.2  | ABW76844.2     | 0.549 | <i>Gerbilliscus kempfi</i> (H) [31]<br><i>Rhipicephalus</i> (V) [31]<br><i>Hyalomma</i> (V) [31]<br><i>Ornithodoros</i> (V) [31]<br><i>Aedes aegypti</i> (V) [32]<br><i>Homo sapiens</i> (H) [33]<br><i>Mastomys</i> (H) [33]<br><i>Lemniscomys striatus</i> (H) [33]                                                                                                                                                      | MBFV   | 0.196  | 0.581  | MBFV /<br>Vertebrate,<br>tick           | <i>Bos taurus</i>        |
| Kunjin virus                  | JX276662.1  | AFR66759.1     | 0.545 | <i>Culex annulirostis</i> (V) [34]<br><i>Aedes tremulus</i> (V) [35]<br><i>Culex australicus</i> (V) [36]<br><i>Culex squamosus</i> (V) [37]<br><i>Aedes vigilax</i> (V) [38]<br><i>Culex quinquefasciatus</i> (V) [36]<br><i>Homo sapiens</i> (H) [39]<br><i>Equus</i> (H) [40]<br>Sentinel chicken (H) [41]<br><i>Nycticorax caledonicus</i> (H) [42]<br><i>Culex pseudovishnui</i> (V) [43]<br><i>Anatidae</i> sp. [43] | MBFV   | 0.197  | 0.337  | MBFV /<br>Vertebrate,<br>mosquito, tick | <i>Gallus gallus</i>     |
| Kyasanur forest disease virus | AY323490.1  | AAQ91607.1     | 0.603 | <i>Homo sapiens</i> (H) <sup>1</sup><br><i>Semnopithecus entellus</i> (H) <sup>1</sup><br><i>Haemaphysalis spinigera</i> (V) [44]<br><i>Gallus gallus</i> (H) [45]                                                                                                                                                                                                                                                         | TBFV   | 1.324  | 0.825  | TBFV / Tick,<br>vertebrate              | <i>Ixodes scapularis</i> |
| Lammi virus                   | NC_024806.1 | YP_009056848.1 | 0.518 | <i>Culicidae</i> (H) <sup>1</sup>                                                                                                                                                                                                                                                                                                                                                                                          | dhIOFV | -0.173 | -0.879 | dhIOFV /<br>Vertebrate,<br>mosquito     | <i>Columba livia</i>     |
| Langat virus                  | NC_003690.1 | NP_620108.1    | 0.592 | <i>Homo sapiens</i> (H) <sup>1</sup><br><i>Mus</i> (H) <sup>1</sup><br><i>Ixodes granulatus</i> (V) [46]<br><i>Haemaphysalis Papuana</i> (V) [47]                                                                                                                                                                                                                                                                          | TBFV   | 0.930  | 1.103  | TBFV / Tick,<br>vertebrate              | <i>Sus scrofa</i>        |
| Louping ill virus             | NC_001809.1 | NP_044677.1    | 0.606 | <i>Homo sapiens</i> (H) <sup>1</sup><br><i>Canis lupus familiaris</i> (H) <sup>1</sup><br><i>Equus caballus</i> (H) <sup>1</sup><br><i>Sus scrofa</i> (H) <sup>1</sup><br><i>Bos taurus</i> (H) <sup>1</sup><br><i>Ovis aries</i> (H) <sup>1</sup><br><i>Ixodes ricinus</i> (V) <sup>1</sup><br><i>Cervinae</i> (H) <sup>1</sup>                                                                                           | TBFV   | 1.348  | 0.758  | TBFV / Tick,<br>vertebrate              | <i>Ixodes scapularis</i> |
| Meaban virus                  | NC_033721.1 | YP_009345031.1 | 0.600 | <i>Aves</i> (H) <sup>1</sup><br><i>Homo sapiens</i> (H) <sup>1</sup><br><i>Ornithodoros maritimus</i> (V) [48]                                                                                                                                                                                                                                                                                                             | TBFV   | 1.280  | 1.020  | TBFV / Tick,<br>vertebrate              | <i>Sus scrofa</i>        |

|                                        |             |                |       |                                                                                                                                                                                                                                                                                                                                                                                                                                                                                                                                                                                       |        |        |        |                                     |                               |
|----------------------------------------|-------------|----------------|-------|---------------------------------------------------------------------------------------------------------------------------------------------------------------------------------------------------------------------------------------------------------------------------------------------------------------------------------------------------------------------------------------------------------------------------------------------------------------------------------------------------------------------------------------------------------------------------------------|--------|--------|--------|-------------------------------------|-------------------------------|
| Mercadeo virus                         | NC_027819.1 | YP_009164031.1 | 0.573 | <i>Culex</i> (H) <sup>1</sup>                                                                                                                                                                                                                                                                                                                                                                                                                                                                                                                                                         | IOFV   | 1.315  | -2.140 | IOFV /<br>Mosquito                  | <i>Aedes albopictus</i>       |
| Modoc virus                            | NC_003635.1 | NP_619758.1    | 0.447 | <i>Homo sapiens</i> (H) <sup>1</sup><br><i>Peromyscus maniculatus</i> (H) <sup>1</sup>                                                                                                                                                                                                                                                                                                                                                                                                                                                                                                | UVFV   | -1.783 | -0.187 | UVFV /<br>Vertebrate                | <i>Xenopus laevis</i>         |
| Montana myotis leukoencephalitis virus | NC_004119.1 | NP_689391.1    | 0.415 | <i>Myotis lucifugus</i> (H) <sup>1</sup>                                                                                                                                                                                                                                                                                                                                                                                                                                                                                                                                              | UVFV   | -2.379 | -0.290 | UVFV /<br>Vertebrate                | <i>Xenopus laevis</i>         |
| Mosquito flavivirus                    | NC_021069.1 | YP_007877501.1 | 0.588 | <i>Culex tritaeniorhynchus</i> (H) <sup>1</sup>                                                                                                                                                                                                                                                                                                                                                                                                                                                                                                                                       | IOFV   | 1.447  | -1.340 | IOFV /<br>Mosquito                  | <i>Culex quinquefasciatus</i> |
| Murray Valley encephalitis virus       | NC_000943.1 | NP_051124.1    | 0.493 | <i>Homo sapiens</i> (H) <sup>1</sup><br><i>Culex annulirostris</i> (V) <sup>1</sup>                                                                                                                                                                                                                                                                                                                                                                                                                                                                                                   | MBFV   | -0.637 | -0.495 | UVFV /<br>Vertebrate,<br>mosquito   | <i>Columba livia</i>          |
| Naranjal virus                         | KF917538.1  | AIU94742.1     | 0.516 | Sentinel hamster (H) <sup>2</sup>                                                                                                                                                                                                                                                                                                                                                                                                                                                                                                                                                     | MBFV   | -0.482 | 0.580  | MBFV /<br>Vertebrate                | <i>Homo sapiens</i>           |
| Negishi virus                          | KT224355.1  | ALP82435.1     | 0.607 | <i>Homo sapiens</i> (H) [49]                                                                                                                                                                                                                                                                                                                                                                                                                                                                                                                                                          | TBFV   | 1.388  | 0.664  | TBFV / Tick,<br>vertebrate          | <i>Ixodes scapularis</i>      |
| New Mapoon virus                       | NC_032088.1 | YP_009328360.1 | 0.553 | <i>Culicidae</i> (H) <sup>1</sup><br><i>Culex annulirostris</i> (H) <sup>1</sup>                                                                                                                                                                                                                                                                                                                                                                                                                                                                                                      | MBFV   | 0.366  | 0.767  | MBFV /<br>Vertebrate,<br>tick       | <i>Bos taurus</i>             |
| Nounane virus                          | NC_033715.1 | YP_009345019.1 | 0.531 | <i>Uranotaenia mashonaensis</i> (H) <sup>2</sup>                                                                                                                                                                                                                                                                                                                                                                                                                                                                                                                                      | dhIOFV | 0.048  | -1.026 | dhIOFV /<br>Vertebrate,<br>mosquito | <i>Aedes albopictus</i>       |
| Ntaya virus                            | NC_018705.3 | YP_006846328.2 | 0.489 | <i>Homo sapiens</i> (H) <sup>1</sup><br><i>Mus musculus</i> (H) <sup>1</sup><br><i>Coquillettidia pseudoconopas</i> (V) [50]<br><i>Uranotaenia alboabdominalis</i> (V) [50]<br><i>Culiseta fraseri</i> (V) [50]<br><i>Coquillettidia aurites</i> (V) [50]<br><i>Aedes simpsoni</i> (V) [50]<br><i>Aedes apicoargenteus</i> (V) [50]<br><i>Aedes africanus</i> (V) [50]<br><i>Aedes albomarginatus</i> (V) [50]<br><i>Lutzia tigripes</i> (V) [50]<br><i>Culex poicilipes</i> (V) [50]<br><i>Culex pruina</i> (V) [50]<br><i>Culex moucheti</i> (V) [50]<br><i>Culex</i> spp. (V) [50] | MBFV   | -0.667 | -1.116 | UVFV /<br>Vertebrate,<br>mosquito   | <i>Anas platyrhynchos</i>     |
| Ochlerotatus caspius flavivirus        | NC_034242.1 | YP_009352228.1 | 0.499 | <i>Ochlerotatus caspius</i> (H) <sup>1</sup><br><i>Aedes albopictus</i> (H) [51]                                                                                                                                                                                                                                                                                                                                                                                                                                                                                                      | IOFV   | -0.136 | -1.812 | IOFV /<br>Mosquito                  | <i>Aedes aegypti</i>          |
| Omsk hemorrhagic fever virus           | NC_005062.1 | NP_878909.1    | 0.577 | <i>Ixodes</i> (V) <sup>1</sup><br><i>Homo sapiens</i> (H) <sup>1</sup><br><i>Ondatra zibethicus</i> (H) <sup>1</sup><br><i>Dermacentor reticulatus</i> (V) <sup>1</sup><br><i>Arvicola amphibius</i> (H) <sup>1</sup>                                                                                                                                                                                                                                                                                                                                                                 | TBFV   | 0.716  | 0.523  | TBFV / Tick,<br>vertebrate          | <i>Bos taurus</i>             |
| Palm Creek virus                       | NC_033694.1 | YP_009344962.1 | 0.527 | <i>Coquillettidia xanthogaster</i> (H) <sup>1</sup>                                                                                                                                                                                                                                                                                                                                                                                                                                                                                                                                   | IOFV   | 0.530  | -2.403 | IOFV /<br>Mosquito                  | <i>Aedes aegypti</i>          |
| Paraiso Escondido virus                | NC_027999.1 | YP_009169331.1 | 0.473 | <i>Psathyromyia abonnenci</i> (H) <sup>1</sup>                                                                                                                                                                                                                                                                                                                                                                                                                                                                                                                                        | MBFV   | -0.896 | -2.060 | UVFV /<br>Mosquito                  | <i>Aedes aegypti</i>          |
| Phnom Penh bat virus                   | NC_034007.1 | YP_009350101.1 | 0.444 | <i>Cynopterus brachyotis</i> (H) <sup>1</sup>                                                                                                                                                                                                                                                                                                                                                                                                                                                                                                                                         | UVFV   | -1.762 | -0.143 | UVFV /<br>Vertebrate                | <i>Xenopus laevis</i>         |

|                                        |             |                |       |                                                                                                                                                                                                                                                                                                                                                                                                                                                                                                                                                                                                                                               |      |        |        |                                         |                                   |
|----------------------------------------|-------------|----------------|-------|-----------------------------------------------------------------------------------------------------------------------------------------------------------------------------------------------------------------------------------------------------------------------------------------------------------------------------------------------------------------------------------------------------------------------------------------------------------------------------------------------------------------------------------------------------------------------------------------------------------------------------------------------|------|--------|--------|-----------------------------------------|-----------------------------------|
| Potiskum virus                         | NC_029054.2 | YP_009433741.1 | 0.477 | <i>Culicidae</i> (V) <sup>1</sup><br><i>Homo sapiens</i> (H) <sup>1</sup><br><i>Rodentia</i> (H) <sup>1</sup><br><i>Gallus gallus domesticus</i> (H) [52]                                                                                                                                                                                                                                                                                                                                                                                                                                                                                     | MBFV | -1.425 | 0.827  | MBFV /<br>Vertebrate                    | <i>Alligator mississippiensis</i> |
| Powassan virus                         | NC_003687.1 | NP_620099.1    | 0.574 | <i>Ixodes scapularis</i> (V) <sup>1</sup><br><i>Homo sapiens</i> (H) <sup>1</sup><br><i>Marmota monax</i> (H) <sup>1</sup><br><i>Ixodes spinipalpis</i> (V) <sup>1</sup><br><i>Dermacentor andersoni</i> (V) <sup>1</sup><br><i>Ixodes cookei</i> (V) <sup>1</sup><br><i>Lepus americanus</i> (H) <sup>1</sup>                                                                                                                                                                                                                                                                                                                                | TBFV | 0.693  | 0.270  | TBFV / Tick,<br>vertebrate,<br>mosquito | <i>Bos taurus</i>                 |
| Quang Binh virus                       | NC_012671.1 | YP_002884239.1 | 0.586 | <i>Culicidae</i> (H) <sup>1</sup><br><i>Culex tritaeniorhynchus</i> (H) <sup>1</sup>                                                                                                                                                                                                                                                                                                                                                                                                                                                                                                                                                          | IOFV | 1.608  | -2.015 | IOFV /<br>Mosquito                      | <i>Aedes albopictus</i>           |
| Rio Bravo virus                        | NC_003675.1 | NP_620044.1    | 0.407 | <i>Homo sapiens</i> (H) <sup>1</sup><br><i>Eptesicus fuscus</i> (H) <sup>1</sup><br><i>Tadarida brasiliensis Mexicana</i> (H) <sup>1</sup><br><i>Molossus ater</i> (H) <sup>1</sup>                                                                                                                                                                                                                                                                                                                                                                                                                                                           | UVFV | -2.468 | -0.908 | UVFV /<br>Vertebrate                    | <i>Xenopus laevis</i>             |
| Rocio virus                            | AY632542.4  | AAV34158.1     | 0.584 | <i>Homo sapiens</i> (H) [53, 54]<br><i>Mus musculus</i> (H) [53]<br><i>Zonotrichia capensis</i> (H) [53]<br><i>Psorophora ferox</i> (V) [55, 56]<br><i>Aedes scapularis</i> (V) [55]                                                                                                                                                                                                                                                                                                                                                                                                                                                          | MBFV | 0.779  | 0.963  | MBFV /<br>Vertebrate,<br>tick           | <i>Sus scrofa</i>                 |
| Royal Farm virus                       | DQ235149.1  | ABB90673.1     | 0.585 | <i>Argas hermanni</i> (V) [57]<br><i>Cricetidae</i> (H) [57]                                                                                                                                                                                                                                                                                                                                                                                                                                                                                                                                                                                  | TBFV | 1.186  | -0.021 | TBFV / Tick,<br>vertebrate,<br>mosquito | <i>Anopheles gambiae</i>          |
| Saboya virus                           | NC_033697.1 | YP_009344967.1 | 0.477 | <i>Mus musculus</i> (H) <sup>1</sup><br><i>Jaculus jaculus</i> (H) <sup>1</sup><br><i>Arvicanthis niloticus</i> (H) <sup>1</sup><br><i>Mastomys sp.</i> (H) <sup>1</sup><br><i>Gerbilliscus kempi</i> (H) <sup>1</sup><br><i>Phlebotomus duboscqi</i> (V) [58, 59]<br><i>Sergentomyia inermis</i> (V) [59]<br><i>Sergentomyia squamipleuris</i> (V) [59]<br><i>Sergentomyia adleri</i> (V) [59]<br><i>Sergentomyia clydei</i> (V) [59]<br><i>Sergentomyia antennata</i> (V) [59]<br><i>Sergentomyia buxtoni</i> (V) [59]<br><i>Sergentomyia dubia</i> (V) [59]<br><i>Sergentomyia schwetzi</i> (V) [59]<br><i>Sergentomyia magna</i> (V) [59] | MBFV | -1.389 | 0.636  | MBFV /<br>Vertebrate                    | <i>Alligator mississippiensis</i> |
| Saumarez Reef virus                    | NC_033726.1 | YP_009345037.1 | 0.576 | <i>Aves</i> (H) <sup>1</sup><br><i>Homo sapiens</i> (H) <sup>1</sup><br><i>Ornithodoros capensis</i> (V) [60]<br><i>Ixodes eudyptidis</i> (V) [60]                                                                                                                                                                                                                                                                                                                                                                                                                                                                                            | TBFV | 1.063  | -0.027 | TBFV / Tick,<br>vertebrate,<br>mosquito | <i>Anopheles gambiae</i>          |
| Sepik virus                            | NC_008719.1 | YP_950478.1    | 0.483 | <i>Culicidae</i> (V) <sup>1</sup><br><i>Ovis aries</i> (H) [10]<br><i>Homo sapiens</i> (H) [10]                                                                                                                                                                                                                                                                                                                                                                                                                                                                                                                                               | MBFV | -1.280 | 0.765  | MBFV /<br>Vertebrate                    | <i>Alligator mississippiensis</i> |
| Siberian tick-borne encephalitis virus | L40361.3    | AAF82240.2     | 0.607 | <i>Ixodes persulcatus</i> (V) [61]                                                                                                                                                                                                                                                                                                                                                                                                                                                                                                                                                                                                            | TBFV | 1.414  | 0.244  | TBFV / Tick,<br>vertebrate              | <i>Ixodes scapularis</i>          |
| Sokoluk virus                          | NC_026624.1 | YP_009126875.1 | 0.588 | <i>Pipistrellus pipistrellus</i> (H) <sup>1</sup>                                                                                                                                                                                                                                                                                                                                                                                                                                                                                                                                                                                             | MBFV | 0.932  | 0.597  | TBFV /<br>Vertebrate,<br>tick           | <i>Ixodes scapularis</i>          |

|                                  |             |                |       |                                                                                                                                                                                                                                                                                                                                                                                                                                                         |      |        |        |                                   |                                   |
|----------------------------------|-------------|----------------|-------|---------------------------------------------------------------------------------------------------------------------------------------------------------------------------------------------------------------------------------------------------------------------------------------------------------------------------------------------------------------------------------------------------------------------------------------------------------|------|--------|--------|-----------------------------------|-----------------------------------|
| Spanish goat encephalitis virus  | NC_027709.1 | YP_009162613.1 | 0.610 | <i>Capra hircus</i> (H) <sup>1</sup>                                                                                                                                                                                                                                                                                                                                                                                                                    | TBFV | 1.449  | 0.635  | TBFV / Tick, vertebrate           | <i>Sus scrofa</i>                 |
| Spondweni virus                  | NC_029055.1 | YP_009222008.1 | 0.580 | <i>Aedes circumluteolus</i> (V) <sup>1</sup><br><i>Mansonia uniformis</i> (V) [62]<br><i>Homo sapiens</i> (H) [63, 64]                                                                                                                                                                                                                                                                                                                                  | MBFV | 0.794  | 1.072  | MBFV / Vertebrate, tick           | <i>Sus scrofa</i>                 |
| St. Louis encephalitis virus     | NC_007580.2 | YP_001008348.1 | 0.524 | <i>Culex quinquefasciatus</i> (V) <sup>1</sup><br><i>Dromaius novaehollandiae</i> (H) <sup>1</sup><br><i>Dasypodidae</i> (H) <sup>1</sup><br><i>Homo sapiens</i> (H) <sup>1</sup><br><i>Culex nigripalpus</i> (V) <sup>1</sup><br><i>Passer domesticus</i> (H) <sup>1</sup>                                                                                                                                                                             | MBFV | -0.052 | -0.494 | MBFV / Vertebrate, mosquito       | <i>Columba livia</i>              |
| Stratford virus                  | KM225263.1  | AIJ19432.1     | 0.529 | <i>Aedes albopictus</i> (V) <sup>1</sup><br><i>Macropodidae</i> (H) <sup>1</sup><br><i>Homo sapiens</i> (H) <sup>1</sup><br><i>Equus caballus</i> (H) <sup>1</sup>                                                                                                                                                                                                                                                                                      | MBFV | 0.048  | -0.146 | TBFV / Vertebrate, mosquito       | <i>Gallus gallus</i>              |
| Tembusu virus                    | NC_015843.2 | YP_004734464.1 | 0.509 | <i>Anser</i> sp. (H) <sup>1</sup><br><i>Culex tritaeniorhynchus</i> (V) [65]<br><i>Culex vishnui</i> (V) [65]<br><i>Culex gelidus</i> (V) [65]<br><i>Culex pipiens</i> (V) [66]                                                                                                                                                                                                                                                                         | MBFV | -0.518 | 0.030  | UVFV / Vertebrate, mosquito       | <i>Columba livia</i>              |
| T'Ho virus                       | NC_034151.1 | YP_009351820.1 | 0.527 | <i>Culex quinquefasciatus</i> (V) <sup>1</sup><br>Vertebrates (H) [67]                                                                                                                                                                                                                                                                                                                                                                                  | MBFV | -0.356 | 0.559  | MBFV / Vertebrate                 | <i>Homo sapiens</i>               |
| Torres virus                     | KM225265.1  | AIJ19434.1     | 0.526 | <i>Culicidae</i> (V) <sup>1</sup><br><i>Aedes albopictus</i> (V) <sup>1</sup><br><i>Culex gelidus</i> (V) [30]<br><i>Sus</i> (H) [30]                                                                                                                                                                                                                                                                                                                   | MBFV | -0.141 | 0.306  | TBFV / Vertebrate                 | <i>Gallus gallus</i>              |
| Turkish sheep encephalitis virus | DQ235151.1  | ABB90675.1     | 0.613 | <i>Ovis</i> (H) [68]                                                                                                                                                                                                                                                                                                                                                                                                                                    | TBFV | 1.465  | 0.582  | TBFV / Tick, vertebrate           | <i>Ixodes scapularis</i>          |
| Tyuleni virus                    | NC_023424.1 | YP_009001464.1 | 0.579 | <i>Ixodes uriae</i> (V) <sup>1</sup>                                                                                                                                                                                                                                                                                                                                                                                                                    | TBFV | 1.058  | -0.047 | TBFV / Tick, vertebrate, mosquito | <i>Anopheles gambiae</i>          |
| Uganda S virus                   | NC_033698.1 | YP_009344968.1 | 0.464 | <i>Mus musculus</i> (H) <sup>1</sup><br><i>Saxicola rubetra</i> (H) <sup>1</sup><br><i>Aedes longipalpis</i> (V) [69]<br><i>Aedes ingrami</i> (V) [69]<br><i>Aedes natronius</i> (V) [69]<br><i>Macaca mulatta</i> (H) [69]                                                                                                                                                                                                                             | MBFV | -1.442 | -0.122 | UVFV / Vertebrate                 | <i>Anas platyrhynchos</i>         |
| Usutu virus                      | NC_006551.1 | YP_164264.1    | 0.551 | <i>Aedes albopictus</i> (V) <sup>1</sup><br><i>Culex pipiens</i> (V) <sup>1</sup><br><i>Turdus merula</i> (H) <sup>1</sup><br><i>Homo sapiens</i> (H) <sup>1</sup><br><i>Anopheles maculipennis</i> (V) <sup>1</sup><br><i>Ochlerotatus caspius</i> (V) <sup>1</sup><br><i>Coquillettidia aurites</i> (V) <sup>1</sup><br><i>Mansonia Africana</i> (V) <sup>1</sup><br><i>Culex neavei</i> (V) <sup>1</sup><br><i>Culex perexiguus</i> (V) <sup>1</sup> | MBFV | 0.325  | 0.497  | MBFV / Vertebrate, tick           | <i>Bos taurus</i>                 |
| Wesselsbron virus                | NC_012735.1 | YP_002922020.1 | 0.477 | <i>Aedes</i> (V) <sup>1</sup><br><i>Homo sapiens</i> (H) <sup>1</sup><br><i>Capra hircus</i> (H) <sup>1</sup><br><i>Ovis aries</i> (H) <sup>1</sup>                                                                                                                                                                                                                                                                                                     | MBFV | -1.324 | 0.237  | MBFV / Vertebrate                 | <i>Alligator mississippiensis</i> |



|                                       |             |                |       |                                                                                                                                                                                                                                                                                                                                                                                                                                                                                                                                                                    |      |        |        |                                         |                                   |
|---------------------------------------|-------------|----------------|-------|--------------------------------------------------------------------------------------------------------------------------------------------------------------------------------------------------------------------------------------------------------------------------------------------------------------------------------------------------------------------------------------------------------------------------------------------------------------------------------------------------------------------------------------------------------------------|------|--------|--------|-----------------------------------------|-----------------------------------|
| West Nile virus lineage 1             | NC_009942.1 | YP_001527877.1 | 0.560 | <i>Aedes</i> (V) <sup>1</sup><br><i>Aves</i> (H) <sup>1</sup><br><i>Homo sapiens</i> (H) <sup>1</sup><br><i>Amblyomma variegatum</i> (V) <sup>1</sup><br><i>Hyalomma marginatum</i> (V) <sup>1</sup><br><i>Rhipicephalus</i> (V) <sup>1</sup><br><i>Culex</i> (V) <sup>1</sup><br><i>Mansonia uniformis</i> (V) <sup>1</sup><br><i>Mimomyia</i> (V) <sup>1</sup><br><i>Chlorocebus aethiops</i> (H) <sup>1</sup><br><i>Mesocricetus auratus</i> (H) <sup>1</sup><br><i>Bubo scandiacus</i> (H) <sup>1</sup><br><i>Mus</i> (H) <sup>1</sup><br><i>Corvidae</i> [70] | MBFV | 0.463  | 0.248  | MBFV /<br>Vertebrate,<br>mosquito, tick | <i>Bos taurus</i>                 |
| West Nile virus lineage 2             | NC_001563.2 | NP_041724.2    | 0.551 | <i>Homo sapiens</i> (H) <sup>1</sup>                                                                                                                                                                                                                                                                                                                                                                                                                                                                                                                               | MBFV | 0.341  | 0.112  | MBFV /<br>Vertebrate,<br>mosquito, tick | <i>Gallus gallus</i>              |
| Western tick-borne encephalitis virus | NC_001672.1 | NP_043135.1    | 0.595 | <i>Homo sapiens</i> (H) <sup>1</sup><br><i>Mus musculus</i> (H) <sup>1</sup><br><i>Ixodes ricinus</i> (V) <sup>1</sup><br><i>Ixodes persulcatus</i> (V) <sup>1</sup>                                                                                                                                                                                                                                                                                                                                                                                               | TBFV | 1.245  | 0.276  | TBFV / Tick,<br>vertebrate              | <i>Ixodes scapularis</i>          |
| Yaounde virus                         | NC_034018.1 | YP_009350103.1 | 0.545 | <i>Culex nebulosus</i> (V) <sup>1</sup><br><i>Culex telesilla</i> (V) [71]<br><i>Culex quiarti</i> (V) [71]<br><i>Eretmapodites oedipodeios</i> (V) [71]<br><i>Aedes aegypti</i> (V) [71]<br><i>Culex perfuscus</i> (V) [71]<br><i>Culex pruina</i> (V) [71]<br><i>Culex duttoni</i> (V) [71]<br><i>Bycanistes sharpie</i> (H) [71]<br><i>Aves</i> (H) [72]<br><i>Praomys</i> (H) [71]                                                                                                                                                                             | MBFV | 0.338  | -0.622 | dhIOFV /<br>Vertebrate,<br>mosquito     | <i>Gallus gallus</i>              |
| Yellow fever virus                    | NC_002031.1 | NP_041726.1    | 0.537 | <i>Aedes aegypti</i> (V) <sup>1</sup><br><i>Aedes simpsoni</i> (V) <sup>1</sup><br><i>Homo sapiens</i> (H) <sup>1</sup><br><i>Aedes luteocephalus</i> (V) <sup>1</sup><br><i>Simiiformes</i> (H) <sup>1</sup>                                                                                                                                                                                                                                                                                                                                                      | MBFV | -0.409 | 1.879  | MBFV /<br>Vertebrate                    | <i>Mus musculus</i>               |
| Yokose virus                          | NC_005039.1 | NP_872627.1    | 0.485 | <i>Miniopterus fuliginosus</i> (H) <sup>1</sup><br><i>Culicidae</i> (V) [73]                                                                                                                                                                                                                                                                                                                                                                                                                                                                                       | MBFV | -1.119 | 0.002  | MBFV /<br>Vertebrate                    | <i>Alligator mississippiensis</i> |
| Zika virus                            | NC_012532.1 | YP_002790881.1 | 0.541 | <i>Aedes aegypti</i> (V) <sup>1</sup><br><i>Aedes albopictus</i> (V) <sup>1</sup><br><i>Macaca mulatta</i> (H) <sup>1</sup><br><i>Homo sapiens</i> (H) <sup>1</sup><br><i>Mus musculus</i> (H) <sup>1</sup>                                                                                                                                                                                                                                                                                                                                                        | MBFV | -0.131 | 1.189  | MBFV /<br>Vertebrate                    | <i>Myotis brandtii</i>            |

<sup>1</sup> Information obtained from Virus-Host Database [74].

<sup>2</sup> Information obtained from GenBank [75].

MBFV = mosquito-borne flavivirus; TBFV = tick-borne flavivirus; IOFV = insect-only flavivirus; UVFV = unknown vector flavivirus; dhIOFV = dual-host IOFV

GC3: Proportion of Guanine+Cytosine at the third position of the codon

Supplementary table S2. Normalized Codon Adaptation Index values of flaviviruses (genus *Flavivirus*) and their putative hosts.

| Virus                                     | Host | <i>Aedes aegypti</i> | <i>Aedes albopictus</i> | <i>Alligator mississippiensis</i> | <i>Anas platyrhynchos</i> | <i>Anopheles gambiae</i> | <i>Bos taurus</i> | <i>Columba livia</i> | <i>Culex quinquefasciatus</i> | <i>Gallus gallus</i> | <i>Homo sapiens</i> | <i>Ixodes scapularis</i> | <i>Mus musculus</i> | <i>Myotis brandtii</i> | <i>Myotis davidii</i> | <i>Sus scrofa</i> | <i>Xenopus laevis</i> |
|-------------------------------------------|------|----------------------|-------------------------|-----------------------------------|---------------------------|--------------------------|-------------------|----------------------|-------------------------------|----------------------|---------------------|--------------------------|---------------------|------------------------|-----------------------|-------------------|-----------------------|
| Aedes flavivirus                          |      | 0,903                | 0,866                   | 0,938                             | 0,947                     | 0,687                    | 0,823             | 0,948                | 0,729                         | 0,897                | 0,865               | 0,706                    | 0,855               | 0,828                  | 0,794                 | 0,751             | 0,927                 |
| Alfuy virus                               |      | 0,958                | 0,923                   | 1,023                             | 1,029                     | 0,739                    | 0,890             | 1,030                | 0,772                         | 0,978                | 0,937               | 0,746                    | 0,930               | 0,899                  | 0,861                 | 0,813             | 1,004                 |
| Alkhurma hemorrhagic fever virus          |      | 0,976                | 0,948                   | 1,043                             | 1,047                     | 0,776                    | 0,926             | 1,051                | 0,821                         | 1,005                | 0,968               | 0,793                    | 0,967               | 0,934                  | 0,898                 | 0,856             | 1,011                 |
| Anopheles flavivirus variant 1            |      | 0,936                | 0,897                   | 0,973                             | 0,981                     | 0,713                    | 0,849             | 0,983                | 0,749                         | 0,931                | 0,892               | 0,719                    | 0,884               | 0,854                  | 0,818                 | 0,774             | 0,963                 |
| Anopheles flavivirus variant 2            |      | 0,934                | 0,894                   | 0,983                             | 0,991                     | 0,710                    | 0,854             | 0,991                | 0,746                         | 0,938                | 0,899               | 0,720                    | 0,892               | 0,861                  | 0,825                 | 0,779             | 0,975                 |
| Apoi virus                                |      | 0,938                | 0,900                   | 1,026                             | 1,033                     | 0,700                    | 0,887             | 1,030                | 0,744                         | 0,970                | 0,939               | 0,718                    | 0,932               | 0,898                  | 0,857                 | 0,809             | 1,021                 |
| Bagaza virus                              |      | 1,031                | 0,993                   | 1,109                             | 1,114                     | 0,793                    | 0,966             | 1,115                | 0,836                         | 1,059                | 1,019               | 0,803                    | 1,008               | 0,976                  | 0,936                 | 0,885             | 1,082                 |
| Bainyik virus                             |      | 0,961                | 0,928                   | 1,035                             | 1,040                     | 0,743                    | 0,901             | 1,042                | 0,779                         | 0,987                | 0,949               | 0,750                    | 0,942               | 0,912                  | 0,874                 | 0,826             | 1,013                 |
| Bamaga virus                              |      | 0,973                | 0,935                   | 1,069                             | 1,072                     | 0,732                    | 0,917             | 1,069                | 0,773                         | 1,011                | 0,973               | 0,734                    | 0,964               | 0,930                  | 0,888                 | 0,837             | 1,055                 |
| Banzi virus                               |      | 0,977                | 0,943                   | 1,065                             | 1,067                     | 0,750                    | 0,931             | 1,070                | 0,797                         | 1,018                | 0,981               | 0,771                    | 0,975               | 0,942                  | 0,902                 | 0,856             | 1,037                 |
| Bouboui virus                             |      | 0,949                | 0,910                   | 1,043                             | 1,047                     | 0,710                    | 0,896             | 1,043                | 0,745                         | 0,985                | 0,950               | 0,723                    | 0,943               | 0,907                  | 0,867                 | 0,814             | 1,036                 |
| Bussuquara virus                          |      | 0,968                | 0,934                   | 1,041                             | 1,046                     | 0,743                    | 0,907             | 1,047                | 0,778                         | 0,994                | 0,955               | 0,749                    | 0,946               | 0,916                  | 0,878                 | 0,829             | 1,018                 |
| Cacipacore virus                          |      | 0,987                | 0,949                   | 1,058                             | 1,065                     | 0,753                    | 0,919             | 1,066                | 0,791                         | 1,009                | 0,970               | 0,766                    | 0,961               | 0,929                  | 0,888                 | 0,839             | 1,039                 |
| Calbertado virus                          |      | 1,013                | 0,977                   | 1,026                             | 1,036                     | 0,786                    | 0,907             | 1,041                | 0,836                         | 0,992                | 0,947               | 0,799                    | 0,941               | 0,911                  | 0,877                 | 0,836             | 0,996                 |
| Cell fusing agent virus                   |      | 0,913                | 0,879                   | 0,965                             | 0,971                     | 0,710                    | 0,856             | 0,975                | 0,753                         | 0,929                | 0,896               | 0,736                    | 0,889               | 0,861                  | 0,830                 | 0,787             | 0,937                 |
| Chaoyang virus                            |      | 1,012                | 0,971                   | 1,083                             | 1,091                     | 0,763                    | 0,931             | 1,091                | 0,800                         | 1,033                | 0,984               | 0,767                    | 0,975               | 0,940                  | 0,897                 | 0,845             | 1,067                 |
| Culex flavivirus                          |      | 1,030                | 0,999                   | 1,050                             | 1,061                     | 0,820                    | 0,939             | 1,067                | 0,876                         | 1,024                | 0,975               | 0,844                    | 0,971               | 0,943                  | 0,911                 | 0,871             | 1,009                 |
| Culiseta flavivirus                       |      | 0,933                | 0,892                   | 0,978                             | 0,988                     | 0,700                    | 0,845             | 0,986                | 0,736                         | 0,929                | 0,892               | 0,704                    | 0,881               | 0,853                  | 0,814                 | 0,767             | 0,974                 |
| Deer tick virus                           |      | 0,992                | 0,961                   | 1,065                             | 1,070                     | 0,776                    | 0,938             | 1,073                | 0,824                         | 1,022                | 0,983               | 0,794                    | 0,978               | 0,946                  | 0,909                 | 0,865             | 1,039                 |
| Dengue virus 1                            |      | 0,993                | 0,949                   | 1,078                             | 1,086                     | 0,737                    | 0,921             | 1,080                | 0,764                         | 1,016                | 0,979               | 0,743                    | 0,964               | 0,930                  | 0,886                 | 0,830             | 1,078                 |
| Dengue virus 2                            |      | 1,014                | 0,968                   | 1,112                             | 1,122                     | 0,751                    | 0,947             | 1,115                | 0,778                         | 1,046                | 1,008               | 0,758                    | 0,992               | 0,959                  | 0,913                 | 0,854             | 1,111                 |
| Dengue virus 3                            |      | 0,985                | 0,941                   | 1,092                             | 1,099                     | 0,735                    | 0,932             | 1,096                | 0,761                         | 1,031                | 0,991               | 0,749                    | 0,976               | 0,943                  | 0,899                 | 0,841             | 1,085                 |
| Dengue virus 4                            |      | 0,978                | 0,937                   | 1,080                             | 1,088                     | 0,734                    | 0,931             | 1,086                | 0,765                         | 1,024                | 0,988               | 0,750                    | 0,974               | 0,942                  | 0,899                 | 0,843             | 1,069                 |
| Donggang virus                            |      | 0,906                | 0,864                   | 0,979                             | 0,987                     | 0,666                    | 0,838             | 0,984                | 0,705                         | 0,927                | 0,887               | 0,680                    | 0,881               | 0,847                  | 0,808                 | 0,760             | 0,975                 |
| Edge Hill virus                           |      | 0,958                | 0,920                   | 1,049                             | 1,053                     | 0,718                    | 0,900             | 1,052                | 0,758                         | 0,992                | 0,955               | 0,721                    | 0,946               | 0,912                  | 0,869                 | 0,817             | 1,044                 |
| Entebbe bat virus                         |      | 0,996                | 0,962                   | 1,068                             | 1,074                     | 0,783                    | 0,945             | 1,077                | 0,818                         | 1,027                | 0,991               | 0,800                    | 0,979               | 0,952                  | 0,917                 | 0,870             | 1,035                 |
| Far Eastern tick-borne encephalitis virus |      | 1,000                | 0,973                   | 1,064                             | 1,069                     | 0,795                    | 0,948             | 1,074                | 0,845                         | 1,029                | 0,988               | 0,816                    | 0,986               | 0,955                  | 0,919                 | 0,878             | 1,029                 |

|                                                    |       |       |       |       |       |       |       |       |       |       |       |       |       |       |       |       |
|----------------------------------------------------|-------|-------|-------|-------|-------|-------|-------|-------|-------|-------|-------|-------|-------|-------|-------|-------|
| Fitzroy River Virus                                | 0,964 | 0,922 | 1,068 | 1,074 | 0,716 | 0,919 | 1,072 | 0,754 | 1,008 | 0,976 | 0,732 | 0,964 | 0,931 | 0,887 | 0,834 | 1,060 |
| Gadgets Gully virus                                | 0,996 | 0,967 | 1,065 | 1,072 | 0,790 | 0,937 | 1,076 | 0,828 | 1,026 | 0,983 | 0,793 | 0,978 | 0,945 | 0,909 | 0,863 | 1,035 |
| Hanko virus                                        | 0,945 | 0,906 | 0,985 | 0,991 | 0,706 | 0,853 | 0,991 | 0,750 | 0,935 | 0,901 | 0,702 | 0,887 | 0,860 | 0,821 | 0,771 | 0,975 |
| Iguape virus                                       | 1,053 | 1,018 | 1,122 | 1,124 | 0,814 | 0,989 | 1,130 | 0,863 | 1,077 | 1,037 | 0,837 | 1,027 | 0,997 | 0,958 | 0,908 | 1,081 |
| Ilheus virus                                       | 0,999 | 0,965 | 1,074 | 1,075 | 0,781 | 0,949 | 1,080 | 0,829 | 1,035 | 0,994 | 0,817 | 0,990 | 0,957 | 0,921 | 0,877 | 1,029 |
| Ilomantsi virus                                    | 0,923 | 0,882 | 0,989 | 0,998 | 0,682 | 0,843 | 0,995 | 0,718 | 0,937 | 0,894 | 0,692 | 0,887 | 0,852 | 0,812 | 0,764 | 0,989 |
| Israel turkey<br>meningoencephalomyelitis<br>virus | 1,015 | 0,977 | 1,092 | 1,097 | 0,776 | 0,949 | 1,099 | 0,818 | 1,041 | 1,000 | 0,787 | 0,992 | 0,959 | 0,917 | 0,867 | 1,069 |
| Japanese encephalitis virus                        | 0,947 | 0,916 | 1,004 | 1,009 | 0,736 | 0,886 | 1,014 | 0,778 | 0,965 | 0,928 | 0,756 | 0,922 | 0,893 | 0,857 | 0,815 | 0,973 |
| Jugra virus                                        | 0,959 | 0,919 | 1,063 | 1,067 | 0,723 | 0,911 | 1,063 | 0,754 | 1,001 | 0,968 | 0,734 | 0,959 | 0,923 | 0,880 | 0,829 | 1,057 |
| Jutiapa virus                                      | 0,974 | 0,930 | 1,073 | 1,080 | 0,714 | 0,914 | 1,073 | 0,754 | 1,005 | 0,975 | 0,709 | 0,960 | 0,926 | 0,880 | 0,823 | 1,085 |
| Kadam virus                                        | 0,966 | 0,936 | 1,045 | 1,048 | 0,757 | 0,919 | 1,051 | 0,803 | 1,001 | 0,964 | 0,776 | 0,962 | 0,927 | 0,891 | 0,846 | 1,018 |
| Kamiti River virus                                 | 0,917 | 0,880 | 0,960 | 0,969 | 0,693 | 0,845 | 0,970 | 0,740 | 0,918 | 0,888 | 0,719 | 0,883 | 0,851 | 0,816 | 0,775 | 0,948 |
| Karshi virus                                       | 1,005 | 0,981 | 1,074 | 1,074 | 0,820 | 0,964 | 1,082 | 0,865 | 1,043 | 1,004 | 0,835 | 1,001 | 0,970 | 0,938 | 0,898 | 1,025 |
| Kedougou virus                                     | 1,012 | 0,983 | 1,093 | 1,093 | 0,808 | 0,973 | 1,099 | 0,849 | 1,056 | 1,016 | 0,831 | 1,008 | 0,980 | 0,945 | 0,901 | 1,042 |
| Kokobera virus                                     | 0,980 | 0,948 | 1,050 | 1,056 | 0,755 | 0,921 | 1,059 | 0,800 | 1,004 | 0,968 | 0,764 | 0,956 | 0,930 | 0,891 | 0,843 | 1,027 |
| Koutango virus                                     | 1,009 | 0,974 | 1,081 | 1,088 | 0,774 | 0,950 | 1,089 | 0,822 | 1,037 | 0,997 | 0,805 | 0,991 | 0,959 | 0,920 | 0,873 | 1,051 |
| Kunjin virus                                       | 0,994 | 0,960 | 1,065 | 1,071 | 0,770 | 0,934 | 1,073 | 0,813 | 1,022 | 0,982 | 0,786 | 0,975 | 0,943 | 0,905 | 0,859 | 1,038 |
| Kyasanur forest disease virus                      | 0,990 | 0,964 | 1,050 | 1,054 | 0,797 | 0,941 | 1,061 | 0,848 | 1,019 | 0,979 | 0,823 | 0,979 | 0,947 | 0,913 | 0,872 | 1,010 |
| Lammi virus                                        | 1,012 | 0,972 | 1,080 | 1,087 | 0,773 | 0,933 | 1,087 | 0,807 | 1,031 | 0,984 | 0,782 | 0,976 | 0,941 | 0,901 | 0,849 | 1,057 |
| Langat virus                                       | 1,000 | 0,974 | 1,074 | 1,076 | 0,803 | 0,956 | 1,081 | 0,849 | 1,039 | 0,997 | 0,821 | 0,996 | 0,962 | 0,927 | 0,885 | 1,037 |
| Louping ill virus                                  | 1,000 | 0,974 | 1,062 | 1,068 | 0,810 | 0,949 | 1,074 | 0,856 | 1,032 | 0,988 | 0,832 | 0,987 | 0,956 | 0,922 | 0,883 | 1,021 |
| Meaban virus                                       | 0,956 | 0,934 | 1,021 | 1,024 | 0,776 | 0,914 | 1,030 | 0,825 | 0,991 | 0,952 | 0,790 | 0,950 | 0,920 | 0,887 | 0,849 | 0,979 |
| Mercadeo virus                                     | 0,944 | 0,912 | 0,964 | 0,973 | 0,736 | 0,855 | 0,978 | 0,786 | 0,932 | 0,891 | 0,751 | 0,884 | 0,858 | 0,827 | 0,788 | 0,936 |
| Modoc virus                                        | 0,988 | 0,943 | 1,086 | 1,091 | 0,721 | 0,924 | 1,086 | 0,763 | 1,014 | 0,986 | 0,718 | 0,971 | 0,937 | 0,889 | 0,833 | 1,096 |
| Montana myotis<br>leukoencephalitis virus          | 0,974 | 0,927 | 1,079 | 1,086 | 0,696 | 0,908 | 1,077 | 0,737 | 1,004 | 0,974 | 0,694 | 0,959 | 0,923 | 0,873 | 0,814 | 1,099 |
| Mosquito flavivirus                                | 1,001 | 0,967 | 1,026 | 1,036 | 0,781 | 0,914 | 1,040 | 0,837 | 0,994 | 0,953 | 0,810 | 0,947 | 0,919 | 0,887 | 0,846 | 0,990 |
| Murray Valley encephalitis<br>virus                | 0,972 | 0,934 | 1,047 | 1,055 | 0,736 | 0,903 | 1,054 | 0,771 | 0,996 | 0,955 | 0,737 | 0,945 | 0,913 | 0,872 | 0,821 | 1,036 |
| Naranjal virus                                     | 0,974 | 0,938 | 1,059 | 1,063 | 0,744 | 0,919 | 1,064 | 0,779 | 1,008 | 0,972 | 0,755 | 0,963 | 0,929 | 0,889 | 0,839 | 1,039 |
| Negishi virus                                      | 0,995 | 0,970 | 1,056 | 1,061 | 0,807 | 0,944 | 1,067 | 0,854 | 1,026 | 0,983 | 0,827 | 0,981 | 0,951 | 0,917 | 0,877 | 1,014 |

|                                        |       |       |       |       |       |       |       |       |       |       |       |       |       |       |       |       |
|----------------------------------------|-------|-------|-------|-------|-------|-------|-------|-------|-------|-------|-------|-------|-------|-------|-------|-------|
| New Mapoon virus                       | 0,921 | 0,889 | 0,986 | 0,991 | 0,714 | 0,871 | 0,995 | 0,755 | 0,946 | 0,913 | 0,744 | 0,907 | 0,877 | 0,843 | 0,801 | 0,960 |
| Nounane virus                          | 0,992 | 0,953 | 1,051 | 1,058 | 0,760 | 0,910 | 1,058 | 0,792 | 1,004 | 0,960 | 0,770 | 0,952 | 0,919 | 0,881 | 0,832 | 1,026 |
| Ntaya virus                            | 1,020 | 0,980 | 1,095 | 1,103 | 0,770 | 0,940 | 1,102 | 0,806 | 1,039 | 0,995 | 0,770 | 0,984 | 0,950 | 0,907 | 0,852 | 1,087 |
| Ochlerotatus caspius flavivirus        | 0,938 | 0,899 | 0,983 | 0,990 | 0,704 | 0,853 | 0,990 | 0,749 | 0,935 | 0,900 | 0,708 | 0,890 | 0,861 | 0,823 | 0,775 | 0,972 |
| Omsk hemorrhagic fever virus           | 1,021 | 0,991 | 1,091 | 1,095 | 0,808 | 0,964 | 1,099 | 0,855 | 1,050 | 1,009 | 0,827 | 1,007 | 0,972 | 0,937 | 0,893 | 1,059 |
| Palm Creek virus                       | 0,996 | 0,957 | 1,031 | 1,040 | 0,767 | 0,901 | 1,043 | 0,810 | 0,991 | 0,944 | 0,769 | 0,933 | 0,906 | 0,868 | 0,820 | 1,014 |
| Paraiso Escondido virus                | 0,996 | 0,956 | 1,064 | 1,073 | 0,745 | 0,905 | 1,069 | 0,781 | 1,008 | 0,960 | 0,734 | 0,950 | 0,915 | 0,872 | 0,820 | 1,065 |
| Phnom Penh bat virus                   | 0,959 | 0,917 | 1,054 | 1,060 | 0,705 | 0,899 | 1,054 | 0,739 | 0,987 | 0,958 | 0,696 | 0,942 | 0,910 | 0,865 | 0,809 | 1,063 |
| Potiskum virus                         | 0,987 | 0,944 | 1,090 | 1,095 | 0,726 | 0,934 | 1,091 | 0,773 | 1,026 | 0,993 | 0,742 | 0,983 | 0,947 | 0,902 | 0,847 | 1,086 |
| Powassan virus                         | 0,996 | 0,966 | 1,062 | 1,066 | 0,786 | 0,938 | 1,070 | 0,834 | 1,022 | 0,982 | 0,802 | 0,978 | 0,946 | 0,911 | 0,867 | 1,032 |
| Quang Binh virus                       | 0,979 | 0,946 | 0,992 | 1,003 | 0,763 | 0,885 | 1,006 | 0,818 | 0,961 | 0,922 | 0,791 | 0,918 | 0,889 | 0,858 | 0,818 | 0,961 |
| Rio Bravo virus                        | 0,988 | 0,938 | 1,085 | 1,094 | 0,699 | 0,912 | 1,085 | 0,740 | 1,009 | 0,979 | 0,694 | 0,962 | 0,926 | 0,875 | 0,816 | 1,110 |
| Rocio virus                            | 1,009 | 0,978 | 1,079 | 1,081 | 0,793 | 0,957 | 1,088 | 0,841 | 1,041 | 1,001 | 0,825 | 0,993 | 0,965 | 0,929 | 0,885 | 1,037 |
| Royal Farm virus                       | 0,987 | 0,962 | 1,045 | 1,050 | 0,800 | 0,929 | 1,056 | 0,841 | 1,014 | 0,969 | 0,803 | 0,964 | 0,936 | 0,901 | 0,859 | 1,009 |
| Saboya virus                           | 0,963 | 0,921 | 1,060 | 1,064 | 0,709 | 0,908 | 1,060 | 0,753 | 0,997 | 0,966 | 0,722 | 0,957 | 0,921 | 0,878 | 0,824 | 1,057 |
| Saumarez Reef virus                    | 0,945 | 0,920 | 1,001 | 1,009 | 0,751 | 0,889 | 1,014 | 0,806 | 0,969 | 0,927 | 0,773 | 0,925 | 0,895 | 0,861 | 0,820 | 0,971 |
| Sepik virus                            | 0,960 | 0,920 | 1,056 | 1,061 | 0,713 | 0,908 | 1,060 | 0,750 | 0,997 | 0,964 | 0,723 | 0,951 | 0,920 | 0,876 | 0,825 | 1,047 |
| Siberian tick-borne encephalitis virus | 1,014 | 0,990 | 1,068 | 1,072 | 0,815 | 0,955 | 1,079 | 0,866 | 1,035 | 0,995 | 0,836 | 0,992 | 0,962 | 0,928 | 0,887 | 1,026 |
| Sokoluk virus                          | 0,975 | 0,945 | 1,037 | 1,039 | 0,780 | 0,922 | 1,043 | 0,813 | 1,000 | 0,964 | 0,790 | 0,953 | 0,929 | 0,895 | 0,851 | 0,996 |
| Spanish goat encephalitis virus        | 1,010 | 0,987 | 1,071 | 1,075 | 0,821 | 0,959 | 1,082 | 0,868 | 1,042 | 0,997 | 0,841 | 0,995 | 0,965 | 0,932 | 0,892 | 1,027 |
| Spondweni virus                        | 0,997 | 0,966 | 1,071 | 1,074 | 0,792 | 0,948 | 1,080 | 0,834 | 1,034 | 0,992 | 0,815 | 0,986 | 0,956 | 0,920 | 0,876 | 1,025 |
| St. Louis encephalitis virus           | 1,042 | 1,004 | 1,113 | 1,120 | 0,794 | 0,966 | 1,121 | 0,845 | 1,063 | 1,019 | 0,808 | 1,011 | 0,977 | 0,935 | 0,884 | 1,089 |
| Stratford virus                        | 0,994 | 0,961 | 1,063 | 1,068 | 0,773 | 0,930 | 1,071 | 0,807 | 1,018 | 0,978 | 0,769 | 0,968 | 0,939 | 0,899 | 0,853 | 1,037 |
| Tembusu virus                          | 0,981 | 0,944 | 1,065 | 1,069 | 0,750 | 0,920 | 1,069 | 0,787 | 1,013 | 0,973 | 0,752 | 0,961 | 0,930 | 0,890 | 0,837 | 1,047 |
| T'Ho virus                             | 0,991 | 0,954 | 1,076 | 1,080 | 0,761 | 0,936 | 1,080 | 0,795 | 1,025 | 0,987 | 0,773 | 0,978 | 0,945 | 0,905 | 0,854 | 1,055 |
| Torres virus                           | 0,956 | 0,924 | 1,031 | 1,034 | 0,741 | 0,900 | 1,035 | 0,774 | 0,982 | 0,949 | 0,739 | 0,940 | 0,910 | 0,872 | 0,825 | 1,008 |
| Turkish sheep encephalitis virus       | 1,012 | 0,988 | 1,074 | 1,079 | 0,823 | 0,961 | 1,085 | 0,871 | 1,043 | 0,997 | 0,845 | 0,996 | 0,966 | 0,933 | 0,892 | 1,030 |
| Tyulenyi virus                         | 1,008 | 0,983 | 1,068 | 1,073 | 0,807 | 0,948 | 1,078 | 0,855 | 1,031 | 0,990 | 0,817 | 0,986 | 0,956 | 0,919 | 0,875 | 1,033 |
| Uganda S virus                         | 0,953 | 0,911 | 1,045 | 1,050 | 0,704 | 0,890 | 1,046 | 0,741 | 0,982 | 0,948 | 0,706 | 0,936 | 0,902 | 0,859 | 0,805 | 1,046 |
| Usutu virus                            | 0,965 | 0,932 | 1,031 | 1,037 | 0,747 | 0,908 | 1,040 | 0,792 | 0,992 | 0,953 | 0,767 | 0,947 | 0,917 | 0,880 | 0,835 | 1,000 |

|                                       |       |       |       |       |       |       |       |       |       |       |       |       |       |       |       |       |
|---------------------------------------|-------|-------|-------|-------|-------|-------|-------|-------|-------|-------|-------|-------|-------|-------|-------|-------|
| Wesselsbron virus                     | 0,977 | 0,934 | 1,068 | 1,076 | 0,719 | 0,916 | 1,074 | 0,761 | 1,009 | 0,973 | 0,733 | 0,963 | 0,926 | 0,884 | 0,831 | 1,067 |
| West Nile virus lineage 1             | 1,006 | 0,973 | 1,071 | 1,076 | 0,781 | 0,944 | 1,079 | 0,829 | 1,031 | 0,990 | 0,801 | 0,984 | 0,952 | 0,915 | 0,869 | 1,038 |
| West Nile virus lineage 2             | 0,999 | 0,964 | 1,063 | 1,070 | 0,767 | 0,934 | 1,072 | 0,819 | 1,022 | 0,979 | 0,792 | 0,974 | 0,942 | 0,904 | 0,859 | 1,031 |
| Western tick-borne encephalitis virus | 0,980 | 0,954 | 1,037 | 1,043 | 0,789 | 0,924 | 1,049 | 0,835 | 1,006 | 0,962 | 0,805 | 0,959 | 0,931 | 0,898 | 0,857 | 0,999 |
| Yaounde virus                         | 1,043 | 1,007 | 1,103 | 1,108 | 0,803 | 0,965 | 1,111 | 0,849 | 1,058 | 1,013 | 0,817 | 1,005 | 0,973 | 0,934 | 0,886 | 1,072 |
| Yellow fever virus                    | 0,955 | 0,921 | 1,053 | 1,055 | 0,732 | 0,920 | 1,054 | 0,778 | 1,001 | 0,970 | 0,755 | 0,962 | 0,930 | 0,891 | 0,844 | 1,026 |
| Yokose virus                          | 0,973 | 0,930 | 1,057 | 1,065 | 0,725 | 0,909 | 1,061 | 0,756 | 0,999 | 0,965 | 0,732 | 0,951 | 0,920 | 0,878 | 0,825 | 1,054 |
| Zika virus                            | 0,999 | 0,965 | 1,089 | 1,092 | 0,772 | 0,952 | 1,094 | 0,815 | 1,042 | 1,001 | 0,792 | 0,996 | 0,962 | 0,921 | 0,874 | 1,060 |

Supplementary table S3. Codon usage tables of all putative hosts.

|                                   | UUU    | UCU    | UAU    | UGU    | UUC    | UCC    | UAC    | UGC    | UUA    | UCA    | UAA    | UGA    | UUG    | UCG    | UAG    | UGG    |
|-----------------------------------|--------|--------|--------|--------|--------|--------|--------|--------|--------|--------|--------|--------|--------|--------|--------|--------|
| <i>Aedes aegypti</i>              | 105803 | 67316  | 90691  | 70139  | 205867 | 122844 | 160830 | 89653  | 48482  | 75347  | 8409   | 7820   | 162093 | 148951 | 5239   | 82534  |
| <i>Aedes albopictus</i>           | 97145  | 56914  | 79108  | 63514  | 200599 | 123298 | 163078 | 87769  | 38157  | 65567  | 6720   | 5873   | 153673 | 154171 | 4553   | 80333  |
| <i>Alligator mississippiensis</i> | 285736 | 266501 | 210156 | 170626 | 299463 | 254351 | 242753 | 208569 | 143195 | 222283 | 9468   | 15055  | 237164 | 70524  | 7528   | 204449 |
| <i>Anas platyrhynchos</i>         | 153243 | 135585 | 95599  | 88295  | 149230 | 126705 | 126168 | 110527 | 73660  | 112384 | 1521   | 2599   | 115508 | 37472  | 1122   | 100505 |
| <i>Anopheles gambiae</i>          | 94614  | 32112  | 52725  | 50824  | 165698 | 108606 | 173108 | 91618  | 26775  | 43545  | 7161   | 6391   | 75745  | 182093 | 4436   | 75670  |
| <i>Bos taurus</i>                 | 176217 | 159245 | 118803 | 110703 | 230161 | 202850 | 170291 | 140579 | 79353  | 126638 | 8272   | 17113  | 136301 | 59386  | 6476   | 137993 |
| <i>Columba livia</i>              | 112853 | 92944  | 74363  | 65581  | 113012 | 93945  | 97512  | 76376  | 50686  | 75022  | 3715   | 4794   | 84780  | 28616  | 2286   | 73187  |
| <i>Culex quinquefasciatus</i>     | 123786 | 42919  | 50760  | 60923  | 198511 | 134088 | 195233 | 107214 | 25108  | 52078  | 7306   | 6787   | 134792 | 188984 | 4659   | 86930  |
| <i>Gallus gallus</i>              | 45768  | 38296  | 32211  | 23851  | 54936  | 42683  | 48342  | 36075  | 19129  | 31442  | 2046   | 2986   | 34146  | 14079  | 1281   | 32616  |
| <i>Homo sapiens</i>               | 189379 | 171196 | 132715 | 117458 | 216388 | 196012 | 161579 | 135489 | 86682  | 139095 | 5404   | 9518   | 143507 | 50249  | 4328   | 134648 |
| <i>Ixodes scapularis</i>          | 74374  | 55722  | 31434  | 33921  | 155979 | 105861 | 129415 | 100447 | 19307  | 37110  | 4241   | 8274   | 66146  | 96803  | 4231   | 72965  |
| <i>Mus musculus</i>               | 422153 | 398250 | 298518 | 279729 | 535439 | 444041 | 394074 | 301384 | 165150 | 289799 | 23403  | 40148  | 329668 | 103815 | 19126  | 306619 |
| <i>Myotis brandtii</i>            | 149256 | 134443 | 103108 | 91596  | 189819 | 173931 | 143371 | 113452 | 69465  | 105333 | 5078   | 9823   | 118397 | 45721  | 4583   | 113559 |
| <i>Myotis davidii</i>             | 113232 | 103442 | 76640  | 70839  | 155462 | 144783 | 117529 | 95128  | 51237  | 81258  | 3784   | 8156   | 90795  | 39444  | 3674   | 92755  |
| <i>Sus scrofa</i>                 | 18160  | 14246  | 12717  | 10902  | 27973  | 21586  | 22023  | 16776  | 6442   | 10448  | 883    | 1739   | 13518  | 5607   | 628    | 17440  |
| <i>Xenopus laevis</i>             | 475411 | 435671 | 348838 | 278073 | 343215 | 321198 | 290496 | 239628 | 259966 | 343805 | 19075  | 17534  | 332659 | 77483  | 9401   | 245817 |
|                                   | CUU    | CCU    | CAU    | CGU    | CUC    | CCC    | CAC    | CGC    | CUA    | CCA    | CAA    | CGA    | CUG    | CCG    | CAG    | CGG    |
| <i>Aedes aegypti</i>              | 81073  | 70190  | 92779  | 70386  | 92845  | 78473  | 111503 | 74523  | 69643  | 116049 | 154187 | 94417  | 248006 | 143421 | 198592 | 92034  |
| <i>Aedes albopictus</i>           | 73743  | 63435  | 85963  | 66043  | 91059  | 79507  | 115067 | 74949  | 67101  | 105136 | 142086 | 89873  | 262230 | 158240 | 205119 | 103979 |
| <i>Alligator mississippiensis</i> | 234983 | 286349 | 199397 | 80956  | 261744 | 253141 | 224817 | 142817 | 134363 | 313100 | 247331 | 88040  | 592915 | 94622  | 565858 | 148393 |
| <i>Anas platyrhynchos</i>         | 122813 | 143338 | 94079  | 42336  | 135241 | 121613 | 119654 | 60556  | 60117  | 145719 | 122456 | 45366  | 278261 | 46915  | 271533 | 61272  |
| <i>Anopheles gambiae</i>          | 51540  | 33672  | 71298  | 60653  | 110524 | 79021  | 127400 | 144786 | 51475  | 75633  | 91709  | 56430  | 341455 | 213374 | 255693 | 126863 |
| <i>Bos taurus</i>                 | 137259 | 183974 | 106989 | 47991  | 226797 | 238009 | 174809 | 122283 | 69555  | 174268 | 124199 | 67416  | 452888 | 98259  | 381244 | 137128 |
| <i>Columba livia</i>              | 83984  | 95097  | 66456  | 29591  | 101401 | 92973  | 87675  | 45990  | 38718  | 99227  | 82943  | 32668  | 206622 | 37795  | 189692 | 48921  |
| <i>Culex quinquefasciatus</i>     | 64004  | 42642  | 58083  | 58474  | 126302 | 97230  | 150387 | 115735 | 44253  | 87713  | 119463 | 75642  | 342737 | 212800 | 255462 | 143812 |
| <i>Gallus gallus</i>              | 33708  | 41672  | 25885  | 14682  | 45753  | 46097  | 39081  | 28305  | 16211  | 42767  | 33018  | 14339  | 104699 | 21091  | 88743  | 26453  |
| <i>Homo sapiens</i>               | 147569 | 198345 | 123609 | 49921  | 212802 | 225420 | 168062 | 115976 | 79488  | 192119 | 140427 | 68859  | 437308 | 81354  | 387120 | 129331 |
| <i>Ixodes scapularis</i>          | 66042  | 55208  | 36505  | 40240  | 159231 | 120308 | 116979 | 101295 | 31749  | 59161  | 59065  | 44503  | 233226 | 106684 | 169406 | 86673  |
| <i>Mus musculus</i>               | 329757 | 450637 | 260637 | 114854 | 495018 | 446868 | 375626 | 229758 | 198032 | 423707 | 293318 | 161412 | 969515 | 151521 | 836320 | 250836 |
| <i>Myotis brandtii</i>            | 114062 | 157094 | 94505  | 38894  | 185980 | 195453 | 149357 | 88661  | 60061  | 148475 | 111991 | 56543  | 375305 | 64984  | 332354 | 107579 |
| <i>Myotis davidii</i>             | 86828  | 124280 | 72079  | 30930  | 154989 | 167094 | 125963 | 77771  | 45385  | 116015 | 84072  | 44250  | 317889 | 60214  | 271506 | 94037  |
| <i>Sus scrofa</i>                 | 13109  | 18561  | 9900   | 4792   | 27053  | 25796  | 18267  | 14145  | 6653   | 16692  | 11567  | 6519   | 53901  | 9860   | 40912  | 13943  |
| <i>Xenopus laevis</i>             | 378042 | 377145 | 298817 | 119961 | 274223 | 244929 | 267467 | 120706 | 213125 | 432029 | 395345 | 122409 | 540897 | 91856  | 585594 | 119667 |

|                                   | AUU    | ACU    | AAU    | AGU    | AUC    | ACC    | AAC    | AGC    | AUA    | ACA    | AAA    | AGA    | AUG    | ACG    | AAG    | AGG    |
|-----------------------------------|--------|--------|--------|--------|--------|--------|--------|--------|--------|--------|--------|--------|--------|--------|--------|--------|
| <i>Aedes aegypti</i>              | 152166 | 86616  | 166027 | 105612 | 207964 | 148111 | 221033 | 123334 | 76072  | 84025  | 220087 | 53146  | 189682 | 133677 | 268281 | 43987  |
| <i>Aedes albopictus</i>           | 137495 | 76150  | 147062 | 100974 | 208043 | 153503 | 225036 | 125677 | 67644  | 75402  | 206848 | 47629  | 186399 | 137826 | 273900 | 44683  |
| <i>Alligator mississippiensis</i> | 289540 | 245848 | 311827 | 221332 | 318302 | 263582 | 322932 | 326064 | 160920 | 294026 | 477989 | 230179 | 377994 | 97321  | 532404 | 200385 |
| <i>Anas platyrhynchos</i>         | 141066 | 117055 | 148135 | 106071 | 153436 | 121061 | 168842 | 167445 | 80265  | 148079 | 247562 | 118152 | 173849 | 57102  | 251100 | 107972 |
| <i>Anopheles gambiae</i>          | 92725  | 39481  | 100091 | 64028  | 202044 | 140594 | 219692 | 156991 | 61791  | 59333  | 126145 | 23006  | 166014 | 201293 | 262509 | 21939  |
| <i>Bos taurus</i>                 | 159826 | 133607 | 163964 | 129267 | 234653 | 210799 | 212732 | 224422 | 76928  | 150192 | 251908 | 130360 | 233655 | 79271  | 350736 | 134871 |
| <i>Columba livia</i>              | 104393 | 80840  | 107072 | 73499  | 121220 | 92966  | 128058 | 113525 | 58143  | 104091 | 182096 | 84864  | 131436 | 42191  | 189730 | 74351  |
| <i>Culex quinquefasciatus</i>     | 128311 | 53265  | 99723  | 87381  | 246469 | 173860 | 278300 | 147234 | 39912  | 52962  | 149090 | 36161  | 187954 | 191512 | 336380 | 40696  |
| <i>Gallus gallus</i>              | 45653  | 36078  | 46039  | 30390  | 59906  | 44951  | 61099  | 54867  | 23805  | 43884  | 74256  | 33289  | 62972  | 20943  | 93393  | 31945  |
| <i>Homo sapiens</i>               | 175259 | 147134 | 190114 | 139465 | 220634 | 203602 | 206688 | 220505 | 82922  | 167136 | 278169 | 133268 | 236510 | 66200  | 353825 | 131616 |
| <i>Ixodes scapularis</i>          | 57705  | 45993  | 45690  | 42553  | 134295 | 111797 | 147940 | 121031 | 31509  | 54105  | 78016  | 39079  | 127674 | 107148 | 208833 | 78311  |
| <i>Mus musculus</i>               | 377698 | 335039 | 382284 | 311331 | 552184 | 465115 | 499149 | 483013 | 180467 | 391437 | 537723 | 297135 | 559953 | 138180 | 825270 | 299472 |
| <i>Myotis brandtii</i>            | 139814 | 114452 | 148430 | 113992 | 199193 | 180990 | 185755 | 185631 | 66531  | 131463 | 226768 | 109231 | 204831 | 65277  | 313098 | 118086 |
| <i>Myotis davidii</i>             | 105319 | 86591  | 110660 | 87677  | 163717 | 149818 | 150586 | 156457 | 49298  | 100435 | 169437 | 82710  | 162715 | 57159  | 249402 | 96344  |
| <i>Sus scrofa</i>                 | 15660  | 13038  | 16598  | 11082  | 28754  | 26456  | 25606  | 23327  | 7191   | 14403  | 23681  | 12052  | 25610  | 9022   | 38617  | 13258  |
| <i>Xenopus laevis</i>             | 470669 | 372157 | 520334 | 336460 | 352434 | 296177 | 419539 | 337006 | 300000 | 463817 | 720130 | 342826 | 502530 | 95128  | 601326 | 252104 |
|                                   | GUU    | GCU    | GAU    | GGU    | GUC    | GCC    | GAC    | GGC    | GUA    | GCA    | GAA    | GGA    | GUG    | GCG    | GAG    | GGG    |
| <i>Aedes aegypti</i>              | 128092 | 123462 | 238605 | 116851 | 115996 | 177203 | 192964 | 115501 | 75096  | 112842 | 295762 | 166203 | 173024 | 103277 | 220013 | 58749  |
| <i>Aedes albopictus</i>           | 120907 | 114500 | 230285 | 116327 | 117235 | 184026 | 202864 | 117142 | 71956  | 106383 | 283652 | 156762 | 180844 | 114481 | 230877 | 62953  |
| <i>Alligator mississippiensis</i> | 220062 | 336797 | 425108 | 182259 | 214803 | 357261 | 392225 | 290968 | 146333 | 328225 | 560811 | 297308 | 410333 | 94451  | 643968 | 250922 |
| <i>Anas platyrhynchos</i>         | 117470 | 181596 | 201191 | 94731  | 105498 | 153253 | 180425 | 133781 | 74738  | 173629 | 275108 | 151883 | 198074 | 45370  | 284768 | 115330 |
| <i>Anopheles gambiae</i>          | 64418  | 75543  | 173980 | 125515 | 109118 | 190816 | 212737 | 204626 | 60279  | 106001 | 179852 | 87574  | 229677 | 195713 | 283970 | 78940  |
| <i>Bos taurus</i>                 | 113850 | 193365 | 220484 | 111861 | 168797 | 326809 | 288879 | 256275 | 70781  | 160241 | 302609 | 174863 | 312161 | 100065 | 441648 | 185928 |
| <i>Columba livia</i>              | 84579  | 119203 | 148911 | 69163  | 84576  | 113404 | 141019 | 95801  | 50144  | 110554 | 201781 | 109153 | 151071 | 39420  | 213638 | 86177  |
| <i>Culex quinquefasciatus</i>     | 113170 | 86702  | 170362 | 108252 | 153568 | 225445 | 270497 | 167341 | 47010  | 81107  | 221992 | 143559 | 218927 | 184999 | 313182 | 89461  |
| <i>Gallus gallus</i>              | 35593  | 56528  | 68683  | 30898  | 36917  | 62202  | 67783  | 53631  | 21277  | 51713  | 84178  | 47765  | 76624  | 24768  | 111123 | 43513  |
| <i>Homo sapiens</i>               | 121302 | 204091 | 246943 | 117456 | 155761 | 311996 | 278549 | 247607 | 78882  | 178106 | 336665 | 183190 | 305878 | 84501  | 451726 | 182999 |
| <i>Ixodes scapularis</i>          | 56833  | 73718  | 66403  | 60167  | 135465 | 195993 | 232841 | 161342 | 31338  | 81570  | 121651 | 88146  | 190498 | 115433 | 225468 | 82020  |
| <i>Mus musculus</i>               | 262535 | 491093 | 515049 | 280522 | 377902 | 637878 | 638504 | 520069 | 182733 | 388723 | 661498 | 411344 | 696158 | 157124 | 965963 | 372099 |
| <i>Myotis brandtii</i>            | 97606  | 165822 | 196915 | 92699  | 140631 | 262234 | 251134 | 199899 | 60268  | 140268 | 275392 | 144558 | 268064 | 65575  | 386908 | 155884 |
| <i>Myotis davidii</i>             | 74166  | 130534 | 149620 | 72558  | 116940 | 225972 | 209517 | 171189 | 45056  | 110134 | 205844 | 112003 | 222467 | 60004  | 317761 | 132602 |
| <i>Sus scrofa</i>                 | 10755  | 19642  | 22309  | 11651  | 20245  | 36983  | 33278  | 29987  | 6447   | 15141  | 27310  | 18686  | 38572  | 10339  | 48046  | 21555  |
| <i>Xenopus laevis</i>             | 351271 | 411579 | 613288 | 253098 | 244083 | 319491 | 432347 | 265240 | 240447 | 424584 | 772321 | 441213 | 434149 | 85444  | 662177 | 270557 |

Supplementary table S4. Sensitivity of nCAI predictions and observations from supplementary table 1

| Virus Group |   | Observed |     |
|-------------|---|----------|-----|
|             |   | +        | -   |
| Predicted   | + | 75       | 19  |
|             | - | 19       | 357 |
| dhIOFV      |   | +        | -   |
| Predicted   | + | 5        | 5   |
|             | - | 0        | 84  |
| IOFV        |   | +        | -   |
| Predicted   | + | 11       | 0   |
|             | - | 3        | 80  |
| MBFV        |   | +        | -   |
| Predicted   | + | 34       | 2   |
|             | - | 15       | 43  |
| TBFV        |   | +        | -   |
| Predicted   | + | 20       | 4   |
|             | - | 0        | 70  |
| UVFV        |   | +        | -   |
| Predicted   | + | 5        | 8   |
|             | - | 1        | 80  |

| Host type  |   | Observed |     |
|------------|---|----------|-----|
|            |   | +        | -   |
| Predicted  | + | 112      | 46  |
|            | - | 1        | 180 |
| Mosquito   |   | +        | -   |
| Predicted  | + | 19       | 23  |
|            | - | 1        | 70  |
| Tick       |   | +        | -   |
| Predicted  | + | 19       | 15  |
|            | - | 0        | 79  |
| Vertebrate |   | +        | -   |
| Predicted  | + | 74       | 8   |
|            | - | 0        | 31  |

| Group     |   | Observed |    |
|-----------|---|----------|----|
|           |   | +        | -  |
| Predicted | + | TP       | FP |
|           | - | FN       | TN |

\* TP: True Positives; FP: False Positives; FN: False Negatives; TN: True Negatives.



## References

1. Hoshino K, Isawa H, Tsuda Y, Sawabe K, Kobayashi M. Isolation and characterization of a new insect flavivirus from *Aedes albopictus* and *Aedes flavopictus* mosquitoes in Japan. *Virology*. 2009;391:119–129. doi:10.1016/j.virol.2009.06.025.
2. Doherty RL, Standfast HA, Domrow R, Wetters EJ, Whitehead RH, Carley JG. Studies of the epidemiology of arthropod-borne virus infections at Mitchell River Mission, Cape York Peninsula, North Queensland IV. Arbovirus infections of mosquitoes and mammals, 1967–1969. *Trans R Soc Trop Med Hyg*. 1971;65:504–513. doi:10.1016/0035-9203(71)90161-1.
3. Doherty RL, Carley JG, Kay BH, Filippich C, Marks EN, Frazier CL. Isolation of virus strains from mosquitoes collected in Queensland, 1972-1976. *Aust J Exp Biol Med Sci*. 1979;57:509–520.
4. Johansen CA, Nisbet DJ, Zborowski P, van den Hurk AF, Ritchie SA, Mackenzie JS. Flavivirus isolations from mosquitoes collected from western Cape York Peninsula, Australia, 1999-2000. *J Am Mosq Control Assoc*. 2003;19:392–396.
5. Charrel RN, Zaki AM, Fakeeh M, Yousef AI, de Chesse R, Attoui H, et al. Low diversity of Alkhurma hemorrhagic fever virus, Saudi Arabia, 1994-1999. *Emerging Infect Dis*. 2005;11:683–688. doi:10.3201/eid1105.041298.
6. Zaki AM. Isolation of a flavivirus related to the tick-borne encephalitis complex from human cases in Saudi Arabia. *Trans R Soc Trop Med Hyg*. 1997;91:179–181.
7. Bondre VP, Sapkal GN, Yergolkar PN, Fulmali PV, Sankararaman V, Ayachit VM, et al. Genetic characterization of Bagaza virus (BAGV) isolated in India and evidence of anti-BAGV antibodies in sera collected from encephalitis patients. *J Gen Virol*. 2009;90 Pt 11:2644–2649. doi:10.1099/vir.0.012336-0.
8. Agüero M, Fernández-Pinero J, Buitrago D, Sánchez A, Elizalde M, San Miguel E, et al. Bagaza virus in partridges and pheasants, Spain, 2010. *Emerging Infect Dis*. 2011;17:1498–1501. doi:10.3201/eid1708.110077.
9. Colmant AMG, Bielefeldt-Ohmann H, Hobson-Peters J, Suen WW, O'Brien CA, van den Hurk AF, et al. A newly discovered flavivirus in the yellow fever virus group displays restricted replication in vertebrates. *J Gen Virol*. 2016;97:1087–1093. doi:10.1099/jgv.0.000430.
10. Grard G, Moureau G, Charrel RN, Holmes EC, Gould EA, de Lamballerie X. Genomics and evolution of Aedes-borne flaviviruses. *J Gen Virol*. 2010;91 Pt 1:87–94. doi:10.1099/vir.0.014506-0.
11. Shope RE. The use of a microhemagglutination-inhibition test to follow antibody response after arthropod-borne virus infection in a community of forest animals. *An Microbiol*. 1963;11:167–169.
12. Gomes G, Causey OR. Bussuquara, A New Arthropod-Borne Virus. *Exp Biol Med*. 1959;101:275–279. doi:10.3181/00379727-101-24909.

13. Batista WC, Tavares G da SB, Vieira DS, Honda ER, Pereira SS, Tada MS. Notification of the first isolation of Cacipacore virus in a human in the State of Rondônia, Brazil. *Rev Soc Bras Med Trop*. 2011;44:528–530. doi:10.1590/S0037-86822011000400028.
14. Bolling BG, Eisen L, Moore CG, Blair CD. Insect-specific flaviviruses from *Culex* mosquitoes in Colorado, with evidence of vertical transmission. *Am J Trop Med Hyg*. 2011;85:169–177. doi:10.4269/ajtmh.2011.10-0474.
15. Cook S, Bennett SN, Holmes EC, De Chesse R, Moureau G, de Lamballerie X. Isolation of a new strain of the flavivirus cell fusing agent virus in a natural mosquito population from Puerto Rico. *J Gen Virol*. 2006;87 Pt 4:735–748. doi:10.1099/vir.0.81475-0.
16. Hayasaka D, Ivanov L, Leonova GN, Goto A, Yoshii K, Mizutani T, et al. Distribution and characterization of tick-borne encephalitis viruses from Siberia and far-eastern Asia. *J Gen Virol*. 2001;82 Pt 6:1319–1328. doi:10.1099/0022-1317-82-6-1319.
17. Johansen CA, Williams SH, Melville LF, Nicholson J, Hall RA, Bielefeldt-Ohmann H, et al. Characterization of fitzroy river virus and serologic evidence of human and animal infection. *Emerging Infect Dis*. 2017;23:1289–1299. doi:10.3201/eid2308.161440.
18. St George TD, Doherty RL, Carley JG, Filippich C, Brescia A, Casals J, et al. The isolation of arboviruses including a new flavivirus and a new Bunyavirus from *Ixodes* (Ceratixodes) uriae (Ixodoidea: Ixodidae) collected at Macquarie Island, Australia, 1975-1979. *Am J Trop Med Hyg*. 1985;34:406–412. doi:10.4269/ajtmh.1985.34.406.
19. Huhtamo E, Moureau G, Cook S, Julkunen O, Putkuri N, Kurkela S, et al. Novel insect-specific flavivirus isolated from northern Europe. *Virology*. 2012;433:471–478. doi:10.1016/j.virol.2012.08.038.
20. Coimbra TL, Nassar ES, Nagamori AH, Ferreira IB, Pereira LE, Rocco IM, et al. Iguape: a newly recognized flavivirus from São Paulo State, Brazil. *Intervirology*. 1993;36:144–152. doi:10.1159/000150333.
21. Braverman Y, Davidson I, Chizov-Ginzburg A, Chastel C. Detection of Israel Turkey Meningo-encephalitis Virus from Mosquito (Diptera: Culicidae) and *Culicoides* (Diptera: Ceratopogonidae) Species and Its Survival in *Culex pipiens* and *Phlebotomus papatasi* (Diptera: Phlebotomidae). *J Med Entomol*. 2003;40:518–521. doi:10.1603/0022-2585-40.4.518.
22. Braverman Y, Boreham PFL, Galun R, Ziv M. The origin of blood meals of biting midges (Diptera: Ceratopogonidae) and mosquitoes (Diptera: Culicidae) trapped in turkey runs in Israel. *Rhod J Agric Res*. 1977.
23. Henderson BE, Tukei PM, McCrae AWR, Ssenkubuge Y, Mugo WN. Virus isolations from ixodid ticks in Uganda. Part II. Kadam virus-a new member of arbovirus group B isolated from *Rhipicephalus pravus* Donitz. *East African Medical Journal*. 1970.
24. Davies FG. Nairobi sheep disease in Kenya. The isolation of virus from sheep and goats, ticks and possible maintenance hosts. *J Hyg*. 1978;81:259. doi:10.1017/S0022172400025092.

25. Wood OL, Moussa MI, Hoogstraal H, Büttiker W. Kadam Virus (Togaviridae, Flavivirus) Infecting Camel-Parasitizing Hyalomma Dromedarii Ticks (Acari: Ixodidae) in Saudi Arabia. *J Med Entomol.* 1982;19:207–208. doi:10.1093/jmedent/19.2.207.
26. Mugo WN, Shope RE. Kadam virus: Neutralization studies and laboratory transmission by dermacentor variabilis. *Trans R Soc Trop Med Hyg.* 1972;66:300–304. doi:10.1016/0035-9203(72)90162-9.
27. Lvov DK, Neronov VM, Gromashevsky VL, Skvortsova TM, Berezina LK, Sidorova GA, et al. Karshi" virus, a new flavivirus (Togaviridae) isolated from Ornithodoros papillipes (Birula, 1895) ticks in Uzbek S.S.R. *Arch Virol.* 1976;50:29–36. doi:10.1007/BF01317998.
28. Fontenille D, Traore-Lamizana M, Diallo M, Thonnon J, Digoutte JP, Zeller HG. New vectors of Rift Valley fever in West Africa. *Emerging Infect Dis.* 1998;4:289–293. doi:10.3201/eid0402.980218.
29. Robin Y, Cornet M, Le Gonidec G, Chateau R, Heme G. Kedougou virus (Ar D14701): a new arbovirus (flavivirus) isolated in Senegal. *Ann Microbiol (Inst Pasteur).* 1978.
30. Johansen CA, Nisbet DJ, Foley PN, Van Den Hurk AF, Hall RA, Mackenzie JS, et al. Flavivirus isolations from mosquitoes collected from Saibai Island in the Torres Strait, Australia, during an incursion of Japanese encephalitis virus. *Med Vet Entomol.* 2004;18:281–287. doi:10.1111/j.0269-283X.2004.00510.x.
31. Fields BN, Knipe DM, Howley PM, Griffin DE. Chapter 33 Flaviviruses. In: *Fields Virology*. 4th edition. Philadelphia: Lippincott Williams & Wilkins; 2001. p. 891.
32. Coz J, Valade M, Cornet M, Robin Y. [Transovarian transmission of a Flavivirus, the Koutango virus, in Aedes aegypti L]. *C R Acad Sci Hebd Seances Acad Sci D.* 1976;283:109–110.
33. Traoré-Lamizana M, Fontenille D, Diallo M, Bâ Y, Zeller HG, Mondo M, et al. Arbovirus surveillance from 1990 to 1995 in the Barkedji area (Ferlo) of Senegal, a possible natural focus of Rift Valley fever virus. *J Med Entomol.* 2001;38:480–492. doi:10.1603/0022-2585-38.4.480.
34. Marshall ID, Woodroffe GM, Hirsch S. Viruses recovered from mosquitoes and wildlife serum collected in the murray valley of south-eastern australia, february 1974, during an epidemic of encephalitis. *Aust J Exp Biol Med.* 1982;60:457–470. doi:10.1038/icb.1982.51.
35. Liehne CG, Leivers S, Stanley NF, Alpers MP, Paul S, Liehne PF, et al. Ord River arboviruses--isolations from mosquitoes. *Aust J Exp Biol Med Sci.* 1976;54:499–504.
36. Russell RC. Mosquito-borne arboviruses in Australia: the current scene and implications of climate change for human health. *Int J Parasitol.* 1998;28:955–969. doi:10.1016/S0020-7519(98)00053-8.
37. Doherty RL, Whitehead RH, Judith Wetters E, Gorman BM. Studies of the epidemiology of arthropod-borne virus infections at Mitchell River Mission, Cape York Peninsula, North Queensland. *Trans R Soc Trop Med Hyg.* 1968;62:430–438. doi:10.1016/0035-9203(68)90095-3.
38. Kay BH, Carley JG, Filippich C. The multiplication of queensland and new guinean arboviruses in culex annulirostris skuse and aedes vigilax (skuse) (diptera: culicidae). *J Med Entomol.* 1975;12:279–283. doi:10.1093/jmedent/12.3.279.

39. Mackenzie JS, Smith DW, Broom AK, Bucens MR. Australian encephalitis in Western Australia, 1978-1991. *Med J Aust.* 1993;158:591–595.
40. Frost MJ, Zhang J, Edmonds JH, Prow NA, Gu X, Davis R, et al. Characterization of virulent West Nile virus Kunjin strain, Australia, 2011. *Emerging Infect Dis.* 2012;18:792–800. doi:10.3201/eid1805.111720.
41. Department of Health | National Arbovirus and Malaria Advisory Committee (NAMAC) annual reports. <http://www.health.gov.au/internet/main/publishing.nsf/content/cda-arboanrep.htm>. Accessed 20 Jul 2018.
42. Boyle DB, Dickerman RW, Marshall ID. Primary viraemia responses of herons to experimental infection with murray valley encephalitis, kunjin and japanese encephalitis viruses. *Aust J Exp Biol Med.* 1983;61:655–664. doi:10.1038/icb.1983.62.
43. Bowen ETW, Simpson DIH, Platt GS, Way HJ, Smith CEG, Ching CY, et al. Arbovirus infections in Sarawak: The isolation of Kunjin virus from mosquitoes of the *Culex pseudovishnui* group. *Annals of Tropical Medicine & Parasitology.* 1970;64:263–268. doi:10.1080/00034983.1970.11686690.
44. Trapido H, Rajagopalan PK, Work TH, Varma MG. Kyasanur Forest disease. VIII. Isolation of Kyasanur Forest disease virus from naturally infected ticks of the genus *Haemaphysalis*. *Indian J Med Res.* 1959;47:133–138.
45. Varma MG, Webb HE, Pavri KM. Studies on the transmission of Kyasanur Forest disease virus by *Haemaphysalis spinigera* Newman. *Trans R Soc Trop Med Hyg.* 1960;54:509–516. doi:10.1016/0035-9203(60)90024-9.
46. Gordon Smith CE. A Virus Resembling Russian Spring–Summer Encephalitis Virus from an Ixodid Tick in Malaya. *Nature.* 1956;178:581–582. doi:10.1038/178581a0.
47. Bancroft WH, Scott RM, Snitbhan R, Weaver RE, Gould DJ. Isolation of Langat virus from *Haemaphysalis papuana* Thorell in Thailand. *Am J Trop Med Hyg.* 1976;25:500–504. doi:10.4269/ajtmh.1976.25.500.
48. Arnal A, Gómez-Díaz E, Cerdà-Cuellar M, Lecollinet S, Pearce-Duvet J, Busquets N, et al. Circulation of a Meaban-like virus in yellow-legged gulls and seabird ticks in the western Mediterranean basin. *PLoS One.* 2014;9:e89601. doi:10.1371/journal.pone.0089601.
49. Ando K, Kuratsuka K, Arima S, Hironaka N, Honda Y, Ishii K. Studies on the Viruses isolated during Epidemic of Japanese B Encephalitis in 948 in Tokyo Area. *Kitasato Archives of Experimental Medicine.* 1952.
50. Smithburn KC, Haddow AJ. Ntaya virus; a hitherto unknown agent isolated from mosquitoes collected in Uganda. *Proc Soc Exp Biol Med.* 1951;77:130–133.
51. Ferreira DD, Cook S, Lopes Â, de Matos AP, Esteves A, Abecasis A, et al. Characterization of an insect-specific flavivirus (OCFVPT) co-isolated from *Ochlerotatus caspius* collected in southern Portugal along with a putative new Negev-like virus. *Virus Genes.* 2013;47:532–545. doi:10.1007/s11262-013-0960-9.
52. Omilabu SA, Fagbami AH, Olaleye OD. Susceptibility of laboratory and domestic animals to experimental infection with Potiskum virus. *Microbios.* 1989;60:53–58.

53. de Souza Lopes O, Coimbra TL, de Abreu Sacchetta L, Calisher CH. Emergence of a new arbovirus disease in Brazil. I. Isolation and characterization of the etiologic agent, Rocio virus. *Am J Epidemiol.* 1978;107:444–449.
54. de Souza Lopes O, de Abreu Sacchetta L, Coimbra TL, Pinto GH, Glasser CM. Emergence of a new arbovirus disease in Brazil. II. Epidemiologic studies on 1975 epidemic. *Am J Epidemiol.* 1978;108:394–401.
55. Mitchell CJ, Forattini OP, Miller BR. Vector competence experiments with Rocio virus and three mosquito species from the epidemic zone in Brazil. *Rev Saúde Pública.* 1986;20:171–177. doi:10.1590/S0034-89101986000300001.
56. de Souza Lopes O, de Abreu Sacchetta L, Franczy DB, Jakob WL, Calisher CH. Emergence of a new arbovirus disease in Brazil. III. Isolation of Rocio virus from *Psorophora Ferox* (Humboldt, 1819). *Am J Epidemiol.* 1981;113:122–125.
57. Williams RE, Casals J, Moussa MI, Hoogstraal H. Royal farm virus: a new tickborne group B agent related to the RSSE complex. *Am J Trop Med Hyg.* 1972;21:582–586. doi:10.4269/ajtmh.1972.21.582.
58. Ba Y, Trouillet J, Thonnon J, Fontenille D. Phlebotomus of Senegal: survey of the fauna in the region of Kedougou. Isolation of arbovirus. *Bull Soc Pathol Exot.* 1999;92:131–135.
59. Fontenille D, Traore-Lamizana M, Trouillet J, Leclerc A, Mondo M, Ba Y, et al. First isolations of arboviruses from phlebotomine sand flies in West Africa. *Am J Trop Med Hyg.* 1994;50:570–574. doi:10.4269/ajtmh.1994.50.570.
60. St George TD, Standfast HA, Doherty RL, Carley JG, Fillipich C, Brandsma J. The isolation of Saumarez Reef virus, a new flavivirus, from bird ticks *Ornithodoros capensis* and *Ixodes eudyptidis* in Australia. *Aust J Exp Biol Med Sci.* 1977;55:493–499.
61. Liu R, Zhang G, Liu X, Li Y, Zheng Z, Sun X, et al. Detection of the Siberian Tick-borne Encephalitis Virus in the Xinjiang Uygur Autonomous Region, northwestern China. *Bing Du Xue Bao.* 2016;32:26–31.
62. Kokernot RH, Smithburn KC, Muspratt J, Hodgson B. Studies on arthropod-borne viruses of Tongaland. VIII. Spondweni virus, an agent previously unknown, isolated from *Taeniorhynchus* (Mansonioides) *uniformis* Theo. *South African Journal of Medical Sciences.* 1957.
63. Wolfe MS, Calisher CH, McGuire K. Spondweni virus infection in a foreign resident of Upper Volta. *Lancet.* 1982;2:1306–1308. doi:10.1016/S0140-6736(82)91511-2.
64. Haddow AJ, Williams MC, Woodall JP, Simpson DI, Goma LK. Twelve isolations of zika virus from *aedes* (*stegomyia*) *africanus* (theobald) taken in and above a uganda forest. *Bull World Health Organ.* 1964;31:57–69.
65. Leake CJ, Ussery MA, Nisalak A, Hoke CH, Andre RG, Burke DS. Virus isolations from mosquitoes collected during the 1982 Japanese encephalitis epidemic in northern Thailand. *Trans R Soc Trop Med Hyg.* 1986;80:831–837. doi:10.1016/0035-9203(86)90397-4.

66. Tang Y, Diao Y, Chen H, Ou Q, Liu X, Gao X, et al. Isolation and genetic characterization of a tembusu virus strain isolated from mosquitoes in Shandong, China. *Transbound Emerg Dis*. 2015;62:209–216. doi:10.1111/tbed.12111.
67. Farfan-Ale JA, Loroño-Pino MA, Garcia-Rejon JE, Hovav E, Powers AM, Lin M, et al. Detection of RNA from a novel West Nile-like virus and high prevalence of an insect-specific flavivirus in mosquitoes in the Yucatan Peninsula of Mexico. *Am J Trop Med Hyg*. 2009;80:85–95.
68. Hartley WJ, Martin WB, Hakiolu F, Chifney ST. A viral encephalitis of sheep in Turkey. *Pendik Institute Journal*. 1969;2:89–100.
69. Dick GWA, Haddow AJ. Uganda S virus. A hitherto unrecorded virus isolated from mosquitoes in Uganda. (I). Isolation and pathogenicity. *Trans R Soc Trop Med Hyg*. 1952;46:600–618. doi:10.1016/0035-9203(52)90021-7.
70. Lanciotti RS, Roehrig JT, Deubel V, Smith J, Parker M, Steele K, et al. Origin of the West Nile virus responsible for an outbreak of encephalitis in the northeastern United States. *Science*. 1999;286:2333–2337. doi:10.1126/science.286.5448.2333.
71. Arbovirus Catalog: Yaounde (YAOV). <https://wwwn.cdc.gov/arbocat/VirusDetails.aspx?ID=528&SID=7>. Accessed 23 Jul 2018.
72. Williams, Richard A. J. Yaoundé-like virus in resident wild bird, Ghana. *Afr J Microbiol Res*. 2012;6. doi:10.5897/AJMR11.479.
73. Tajima S, Takasaki T, Matsuno S, Nakayama M, Kurane I. Genetic characterization of Yokose virus, a flavivirus isolated from the bat in Japan. *Virology*. 2005;332:38–44. doi:10.1016/j.virol.2004.06.052.
74. Virus-Host DB. Virus-Host Database. 2017. <http://www.genome.jp/virushostdb/>. Accessed 6 Oct 2017.
75. Benson DA, Cavanaugh M, Clark K, Karsch-Mizrachi I, Lipman DJ, Ostell J, et al. GenBank. *Nucleic Acids Res*. 2013;41 Database issue:D36–42. doi:10.1093/nar/gks1195.
